1       **Desert fish populations tolerate extreme salinity change to**  
2                                   **overcome hydrological constraints**

3  
4       Celia Schunter<sup>1\*</sup>, Lucrezia C. Bonzi<sup>2</sup>, Jessica Norstog<sup>2</sup>, Jade Sourisse<sup>1</sup>, Michael L.  
5       Berumen<sup>2</sup>, Yoseline Angel<sup>3</sup>, Stephen D. Parkes<sup>3</sup>, Matthew F. McCabe<sup>3</sup> and Timothy  
6                                   Ravasi<sup>4\*</sup>

7  
8       <sup>1</sup>Swire Institute of Marine Science, School of Biological Sciences, The University of  
9       Hong Kong, Pokfulam, Hong Kong SAR

10      <sup>2</sup>Red Sea Research Center, Division of Biological and Environmental Sciences &  
11      Engineering, King Abdullah University of Science and Technology, Thuwal, Kingdom of  
12      Saudi Arabia

13      <sup>3</sup>Water Desalination and Reuse Center, Division of Biological and Environmental  
14      Sciences & Engineering, King Abdullah University of Science and Technology, Thuwal,  
15      Kingdom of Saudi Arabia

16      <sup>4</sup>Marine Climate Change Unit, Okinawa Institute of Science and Technology Graduate  
17      University, 1919–1 Tancha, Onna-son, Okinawa 904–0495, Japan

18

19      \*corresponding authors: Celia Schunter ([celiaschunter@gmail.com](mailto:celiaschunter@gmail.com)) and Timothy Ravasi  
20      ([timothy.ravasi@oist.jp](mailto:timothy.ravasi@oist.jp))

21

22 **Abstract**

23 The unstable nature of freshwater ponds in arid landscapes represent a sizable challenge  
24 for strictly aquatic organisms, such as fishes. Yet the Arabian Desert, bordering the  
25 coastline of the Red Sea, plays host to a species very well adapted to such extreme  
26 environments: the Arabian pupfish, *Aphanius dispar*. In this study, we estimated patterns  
27 of hydrological connectivity; population structure and stable isotope for samples of *A.*  
28 *dispar* living in small, isolated ponds of nearly-freshwater in the Arabian desert and  
29 highly saline coastal lagoons along the Red Sea. The genomic and hydrological analyses  
30 indicate that populations are largely separated by drainage origin, as fish from desert  
31 ponds appear to be transported to coastal lagoons of the Red Sea along ephemeral river  
32 systems arising from flash flood events. Further, our study indicates there is an ecological  
33 change when being washed from pond environments to coastal waters, due to a  
34 significant shift in muscle stable isotopes ratios between both groups. Considering that  
35 the genetic breaks are mostly observed between drainage origin, this study suggests that  
36 *A. dispar* can survive large changes in salinity and ecological regimes over small time-  
37 scales.

38

## 39 **Introduction**

40 Population dynamics are often defined and restricted by differences in environmental  
41 conditions. A growing body of research shows that environmental gradients are often a  
42 driver for selection, but also population structure, as adaptation to local conditions can  
43 lead to selection of particular genotypes on either side of an ecological break (Wang &  
44 Bradburd, 2014). Differences in fitness and conditioning across such ecological gradients  
45 can lead to restricted dispersal or even dispersal barriers, which in turn can significantly  
46 shape the population structure at relatively small geographic scales (Sexton, Hangartner,  
47 & Hoffmann, 2014). This concept is tremendously important in evolutionary biology, as  
48 ecological gradients have been suggested as one of the initial mechanisms of divergence  
49 that can promote speciation of lineages (Doebeli & Dieckmann, 2003).

50

51 A small number of species have the ability to traverse ecological barriers, even  
52 significant dispersal barriers and eventually conquer some of the world's extreme  
53 environments, via physiological and behavioural adaptations (Kelley et al., 2014; Moore,  
54 Cooper, Biewener, & Vasudevan, 2017). Among the most intriguing of these examples  
55 are fishes that live in desert environments, as they inhabit highly isolated and often  
56 ephemeral ponds in very arid landscapes. It is assumed that most of these species have  
57 high phenotypic plasticity, as these fishes encounter ephemeral streams (Furness, 2016),  
58 large temperature fluctuations (Bennett & Beitinger, 1997), extreme changes in water  
59 chemistry (Kavembe, Franchini, Irisarri, Machado-Schiaffino, & Meyer, 2015) and high  
60 spatiotemporal variability in water supply (Fisher, Gray, Grimm, & Busch, 1982).  
61 Among the main questions regarding these particular groups of fishes, the most intriguing

62 is how such isolated populations continue to survive after an initial colonization event. It  
63 is well known that isolation of populations can result in a slew of detrimental conditions,  
64 such as loss of genetic variability, inbreeding depression or the accumulation of  
65 deleterious mutations (Gaggiotti, 2003). Considering that population persistence and  
66 long-term survival is largely influenced by genetic diversity (Bouzat, 2010), living in  
67 isolated and highly restricted water bodies might threaten the persistence of desert fishes  
68 over long time-scales.

69

70 Among the few fish groups that inhabit arid environments, Cyprinodontiformes exhibit  
71 remarkable adaptations to extreme conditions. For example, the African turquoise  
72 killifish (*Nothobranchius furzeri*) evolved an embryonic diapause, allowing fertilized  
73 eggs to survive a dry period (Furness, 2016). Furthermore, killifish can also be found in  
74 habitats with widely varying salinities and they are therefore categorized as euryhaline  
75 (Wood & Marshall, 1994). The genus *Fundulus*, for instance, displays a wide range of  
76 osmotolerant physiologies (Whitehead, 2010), with *F. heteroclitus* being able to rapidly  
77 acclimate to an osmotic shock by changing its transcriptional program and later  
78 remodeling its tissues (Whitehead, Galvez, Zhang, Williams, & Oleksiak, 2011). Despite  
79 these remarkable adaptations, some Cyprinodontiformes occupy very restricted habitats.  
80 For example, the Devils Hole pupfish (*Cyprinodon diabolis*) lives only in Devils Hole  
81 (in the Amargosa Desert of Nevada) and it is described as occupying the smallest known  
82 natural range (a single pool < 80 m<sup>2</sup>) for any vertebrate species (Martin, Crawford,  
83 Turner, & Simons, 2016). Indeed, many species of fish inhabiting such arid landscapes  
84 are currently listed as endangered (Hopken, Douglas, & Douglas, 2013; Van Haverbeke,

85 Stone, Coggins, & Pillow, 2013) and have been of conservation concern for decades  
86 (Meffe & Vrijenhoek, 1988).

87

88 The Arabian pupfish, *Aphanius dispar* (Cyprinodontidae), is present in the Middle East  
89 with landlocked populations in countries such as Oman, Iran and Saudi Arabia (Al-  
90 Kahem-Al-Balawi et al., 2008; Freyhof, 2014; Haas, 1982; Hrbek & Meyer, 2003). This  
91 species represents an interesting conundrum, as it has a large distribution range, but it  
92 inhabits highly restricted ephemeral ponds with no permanent rivers around them.  
93 Furthermore, from a pilot study we revealed that they are also present in coastal lagoons  
94 of the Red Sea. Phylogenetic analyses of the genus suggest that this group has saltwater  
95 ancestry, with the closing and drying of the Tethys Sea resulting in landlocked remnant  
96 populations which likely then diverged due to the resultant strong ecological changes  
97 (Hrbek & Meyer, 2003).

98

99 In this study we explore suitable habitats for *A.dispar* to live in the desert as well as the  
100 Red Sea coastline in Saudi Arabia and aim to understand the population connectivity of  
101 this species. We investigate the environmental conditions and population structure of *A.*  
102 *dispar* in the Arabian desert by employing a multi-disciplinary approach that combines  
103 hydrological predictive mapping, population genomics, stable isotope analysis, as well as  
104 chemical and physical analyses of water bodies.

105

## 106 **Methods**

### 107 *Sample collection*

108 In order to acquire information on the presence of water ponds and streams in the Saudi  
109 Arabian desert, extensive searches were performed using Google Earth, high-resolution  
110 satellite data and through contacting local landowners and regional police. Subsequently,  
111 a range of potential water ponds were identified and visited (see Figure 1). From a survey  
112 of 28 locations, *Aphanius dispar* was detected at 11 sites and was collected using a 3 m  
113 wide seine net. Fish length was measured, and a piece of the dorsal fin was cut and  
114 placed in 96% ethanol. Fish were then returned to the pond. Individuals with fins too  
115 small for finclip collection were euthanized with a blow to the head, with the entire tail  
116 preserved in ethanol. All procedures were performed in accordance with relevant  
117 guidelines and regulations and were approved and completed with the ethics permit  
118 15IBEC35\_Ravasi from the Institutional Biosafety and BioEthics Committee (IBEC) of  
119 the King Abdullah University of Science and Technology.

120

### 121 *Stable isotopes*

122 We employed two types of stable isotope measurements: fish muscle tissue and pond  
123 water isotopes. Fish muscle tissue can give indications on the diet of the fish in the ponds  
124 and the sea (Zanden & Rasmussen, 2001). Water isotope analysis can indicate the  
125 evaporative and flow processes of the water body. While these distinct isotopic  
126 measurements have different applications, they both help to understand the biological and  
127 hydrological connectivity of the ponds in the desert. Isotope ratios are reported relative to  
128 their respective standards:

129 1) 
$$\delta = \left( \frac{R_{sample}}{R_{standard}} - 1 \right) \text{‰}$$

130 where  $R_{sample}$  and  $R_{standard}$  are the isotope ratios (heavier isotopologue to the more  
131 abundant isotopologue) measured in the sample.

132

133 *a) Water stable isotope analysis*

134 Water samples from the six desert ponds were analyzed for isotope analysis at the King  
135 Abdullah University of Science and Technology on a Picarro Wavelength Scanning  
136 Cavity Ringdown Spectrometer (WSCRDS L115-I, Picarro Inc., Sunnyvale, CA, USA)  
137 interfaced to a liquid autosampler (CTC HTC Pal liquid autosampler; LEAP  
138 Technologies, Carrboro, NC, USA).  $\delta^2\text{H}$  and  $\delta^{18}\text{O}$  were measured and are isotope ratios  
139 for  $^2\text{H}^1\text{H}^{16}\text{O}$  and  $^1\text{H}_2^{18}\text{O}$  isotopologues, respectively. Samples were referenced to the  
140 VSMOW scale using laboratory working standards previously referenced to the  
141 VSMOW2/ SLAP2 (Standard Light Antarctic Precipitation) standards. The  $\delta^2\text{H}$  and  $\delta^{18}\text{O}$   
142 values of samples was determined using the two-point linear normalization method  
143 described in Paul *et al.* (2007) (Paul et al., 2007), which calibrate sample isotope ratios  
144 using the linear relationship between the true and measured isotope ratios of two working  
145 standards that bracket the sample. Each measurement of standards and samples consisted  
146 of 10 injections of which the last 4 were used to determine isotope ratios. Uncertainty for  
147 the reported isotope values is determined by propagating the standard deviations ( $1\sigma$ ) of  
148 the last 4 injections from measurement of standards and samples.

149

150 *b) Muscle tissue stable isotope preparation and analysis*

151 For each collection site, a subset of adult fish was sacrificed, and bodies were frozen with  
152 dry ice in the field. In the lab, fish were thawed, and white muscle tissue was de-skinned,  
153 descaled and dried for 24 h at 60 °C. Samples were ground using a MP Bio FastPrep-24  
154 instrument (6.5 m/s for 60s until pulverized, repeated 1-4 times) and Lysing Matrix E 2  
155 mL tubes with 1 x 4.0 mm ceramic sphere, 30±3 1.4 mm ceramic spheres. Tissues were  
156 rinsed in 1 mL 2:1 chloroform-methanol solution and shaken vigorously for 30 s to  
157 remove isotope differences due to a lipid content bias, as described by Ehrich *et al.*  
158 (2011) (Ehrich et al., 2011). The solution was transferred to 1.5 mL Eppendorf tubes,  
159 leaving the spheres behind. The samples were left to stand for 15 minutes at room  
160 temperature, and then centrifuged for 10 minutes at 3,400 rpm. The supernatant was  
161 discarded, and the chloroform-methanol rinse was repeated two additional times. Samples  
162 were then dried in 1.5 mL Eppendorf tubes for 24 h at 60 °C and broken apart using a  
163 scoopula. Approximately 1±0.2 mg of sample was placed in tin capsules for solid  
164 samples (5 x 9 mm) for the Isotope Ratio Mass Spectrometry analysis (IRMS). <sup>13</sup>C  
165 and <sup>15</sup>N isotopes were analyzed using a PDZ Europa ANCA-GSL elemental analyzer  
166 interfaced to a PDZ Europa 20-20 isotope ratio mass spectrometer (Sercon Ltd.,  
167 Cheshire, UK) at the Stable Isotope Facility at the University of California, Davis.  
168 Briefly, samples were combusted at 1000°C with chromium oxide and silvered copper  
169 oxide, with a subsequent oxides removal in a reduction reactor. N<sub>2</sub> and CO<sub>2</sub> were  
170 separated on a Carbosieve GC column (65°C, 65 mL/min) before entering the IRMS.  
171 Samples were interspersed with replicates of two laboratory standards and isotope ratio  
172 delta values were measured relative to the international standards VPDB (Vienna  
173 PeeDee Belemnite) and Air for carbon and nitrogen, respectively (Sharp, 2007).



174 Statistical analyses for tissue stable isotopes were carried out using R (R version 3.4.0,  
175 2017-04-21). Data were checked for normality with the Shapiro-Wilk test and for  
176 homogenous variance with the Fligner-Killeen test and considered significant at  $p < 0.05$ .  
177 The correlation between  $\delta^{13}\text{C}$  and  $\delta^{15}\text{N}$  was tested with a Spearman's correlation, as well  
178 as the allometric effect of size on isotope contents. Since data did not satisfy conditions  
179 for the use of parametric statistics, a two-way non-parametric ANCOVA in the *sm*  
180 package (Bowman & Azzalini, 2014) was used to test for differences in  $\delta^{13}\text{C}$  and  $\delta^{15}\text{N}$   
181 among sites, with fish size as the covariate. Sampling sites of *A. dispar* were split into  
182 two water type groups (Desert Pond and Sea Water), as well as in four different clusters  
183 (determined through genetic and hydrological analysis, stated below), depending on the  
184 drainage basin they belong to (from north to south: Cluster 1 = DP1, DP2, SW1, SW2;  
185 Cluster 2 = DP3, SW3; Cluster 3 = DP4, SW4; Cluster 4 = DP5, DP6, SW5). Differences  
186 in fish muscle isotopic signatures between different desert pond were also evaluated.  
187 Muscle mean content in  $\delta^{13}\text{C}$  and  $\delta^{15}\text{N}$  and standard deviation for the different sites (n:  
188 DP3 =11, DP4 = 11, all others = 12) were calculated and visualized in R.

189

#### 190 *Water parameters and samples*

191 To quantify the water chemistry of the desert ponds and better understand the  
192 environmental conditions of the fish habitat, we took *in situ* measurements as well as  
193 collected water samples for later analyses. A portable Ocean Seven 305 Plus CTD  
194 (Idronaut) was used to measure temperature, pressure, conductivity, salinity, percent  
195 oxygen saturation, parts per million of  $\text{O}_2$  and pH on site. The CTD sonde was submersed  
196 at a depth of approximately 30 cm and left to acclimate for one minute. Five minutes of

197 measurements were taken at a sampling rate of 5 seconds, with the total of 60 data points  
198 averaged to provide a single value for each parameter per site (referred to as “average  
199 temperature”). Water samples at each site were collected in 500 ml HDPC containers,  
200 either filled only with water for isotope and water analysis, or with 2ml of 5% nitric acid  
201 for preservation for chemical water analysis. Water samples were analyzed using Ion  
202 Chromatography. Seawater samples (sites SW1 – SW5) were diluted x10 and filtered  
203 using Dionex OnGuard II Ba/Ag/H 2.5 cc cartridges to remove  $\text{SO}_4^{2-}$  and  $\text{Cl}^-$ . Standards  
204 and water samples were transferred to Autoselect Polyvial 10 mL vials and covered with  
205 septa and caps. Samples were run on Dionex ICS-3000 with the Chromeleon  
206 Chromatography Management System (version 6.7) program and using an autosampler.  
207 Photometric analysis was performed on water samples to measure for chlorides, sulphates  
208 and silica. Standards were run accordingly (chlorides: 0 ppm, 20 ppm, 200 ppm;  
209 sulphates: 0, 30 and 100 ppm; silica: 0, 100 and 500 ppb). Water samples were  
210 transferred to cuvettes and loaded into an Aquakem 250 (Thermo Scientific) for analysis.  
211 For samples that were outside of standard ranges, samples were diluted appropriately (see  
212 Supplementary materials) and re-run.

213

#### 214 *Streamflow mapping*

215 To establish the hydrological connectivity from the desert highlands to the Red Sea  
216 coastline (and the resultant possible genetic links between the locations where pupfish  
217 were present), we needed to determine the predominant flow direction at each cell of an  
218 underlying topographic model. The ArcGIS-based hydrology toolset was used for the  
219 extraction and analysis of watersheds and streamflow, using the Advanced Spaceborne

220 Thermal Emission and Reflection Radiometer (ASTER) Global Digital Elevation Model  
221 (ASTGTM, JPL 2009) to provide a topographic description of the region. Raw ASTER  
222 data, distributed by NASA as GeoTIFF files, have a 30 m spatial resolution and are  
223 referenced to the WGS84 coordinate system. Supplementary Figure 1 shows the flow  
224 process of delineating watershed boundaries and stream networks from a digital elevation  
225 model (DEM). To ensure that any water “flow” can move from one cell to any adjacent  
226 cell, a depressionless DEM was obtained by filling any localized “sinks” that might have  
227 formed as an artefact of the interpolation process. From this, the natural flow direction (as  
228 dictated by the direction of steepest descent) and the flow accumulation per cell (i.e. the  
229 number of upstream cells “draining” to that particular cell) can then be calculated. Only  
230 those cells with a high accumulation threshold (>1000 contributing cells) are considered  
231 to represent a dominant flow path. A streamline can be produced by connecting these  
232 cells. Watershed boundaries are delineated automatically based on the natural water  
233 divides, which follow the highest elevations in the DEM. Using Google Earth imagery  
234 (Google Earth 7.1.2.2041; December 31, 2016) as an underlying base map, we can  
235 determine the potential connectivity routes for fish by following delineated streamlines  
236 from the highest sampled locations on the mountains, to the lowest points near the  
237 shoreline. A visual interrogation of satellite images allowed elements such as dams,  
238 bridges, culverts and agricultural regions to be identified and to manually edit segments  
239 along the streamlines.

240

241 *DNA extractions and Restriction Site Associated DNA Sequencing (RAD-Seq)*

242 To understand the genetic population structure and genetic connectivity of *A. dispar* we  
243 used 5 mm pieces of fin clip from each individual sample for 28-29 individuals per site  
244 (at 11 sites) to extract DNA with 96-well DNA extraction kits from Qiagen (DNeasy 96  
245 Blood and Tissue Kit) or Macherey-Nagel (NucleoSpin 96 Tissue). The manufacturer  
246 protocols were followed with a deviation of 8-10 hours of lysis and elution in 50  $\mu$ l H<sub>2</sub>O.  
247 Concentrations were measured with a Qubit 2.0 fluorometer with a dsDNA High  
248 Sensitivity reagent kit. We used a modified double digest (ddRad) protocol (Peterson,  
249 Weber, Kay, Fisher, & Hoekstra, 2012). Briefly, DNA was digested using SphI High  
250 Fidelity and MluCI High Fidelity enzymes with the appropriate CutSmart Buffer (New  
251 England Biolabs) and cleaned with AMPURE XP beads. Adapters were ligated to 100 ng  
252 of digested DNA with a combination of sixteen adapters and eleven indices to uniquely  
253 identify individual samples out of 80 multiplexed samples in one sequencing lane. Pools  
254 were created from equally concentrated and cleaned samples and size selected in a  
255 BluePippin (Sage Science) with 2% Gel Cassettes to a size of 300bp. We used a KAPA  
256 Hifi Ready Mix for the PCR amplification with ten PCR cycles and temperatures  
257 according to the manufacturer. Samples were run on a bioanalyzer (Agilent) and a qPCR  
258 (7900 HT Fast Real Time PCR system, ABI) was used to quantify and combine all 80  
259 samples within one library at equimolar concentration. Four libraries were then  
260 sequenced paired-end on an Illumina HiSeq2000 to a length of 100bp at the KAUST  
261 Bioscience Core Lab facility.

262

263 *RAD-Seq data processing*

264 Raw sequence fastq files were de-multiplexed for each lane of Illumina using  
265 *process\_radtags* in the software STACKS 1.40 (Catchen, Hohenlohe, Bassham, Amores,  
266 & Cresko, 2013). All sequences were quality trimmed with Trimmomatic 0.33 (Bolger,  
267 Lohse, & Usadel, 2014) with a Phred score quality cutoff of 30. Individuals with less than  
268 300,000 remaining first read sequences (from paired end reads) were removed from the  
269 analysis. Due to the lack of a reference genome for this species, we ran the quality  
270 trimmed first read files through the *denovo\_map* perl script in STACKS. The final  
271 optimized parameters were set to a conservative number of mismatches allowed (-n 2 and  
272 -M 2), a minimum number of identical reads to form a stack was three and SNP calling  
273 was performed with an upper bound error rate of 0.05 (--bound\_high 0.05). After the  
274 putative SNP detection, the function *populations* was run to select putative SNPs meeting  
275 several criteria. The variant had to have a minimum read number of 10 (-m 10), be  
276 present in at least seven of the eleven locations (-p 7) and in more than 20 individuals per  
277 locations (-r 0.72). A minimum allele frequency filter of 0.05 was applied and we chose  
278 to use one randomly putative SNP from each stack. The resulting vcf file was converted  
279 into different input file formats for further analysis using PGDSPIDER (Lischer &  
280 Excoffier, 2012). To avoid a bias due to duplicated sequences across the genome,  
281 putative SNPs were discarded if heterozygosity was higher than 0.5 (calculated with  
282 *vcftools*, following (Danecek et al., 2011) and if the mean read depth was a median  
283 absolute deviation away from the median depth (Seeb et al., 2014). Hardy-Weinberg  
284 exact tests were performed in Genepop version 4.6 (Rousset, 2008) and putative SNPs  
285 were removed if there was a significant deviation in more than four of the eleven

286 locations for which tests could be performed. All SNPs that did not pass the criteria were  
287 blacklisted in *populations* and removed from further analysis.

288

### 289 *Population genetics and clustering analyses*

290 Population genetics metrics such as average allele number, private alleles, inbreeding  
291 coefficient and locus and pair-wise  $F_{ST}$  were obtained for the set of filtered final SNPs  
292 with *populations*. VCFtools v0.1.13 was used to look at minor allele frequencies, Hardy-  
293 Weinberg equilibrium and locus and population heterozygosities (Danecek et al., 2011).  
294 Pairwise AMOVA  $F_{ST}$  values for population differentiation measures and significance  
295 ( $p < 0.05$ ) were obtained in GenoDive V2.0b27 using 10,000 permutations as well as the  
296 pairwise kinship coefficient  $r$  (Meirmans & Van Tienderen, 2004). Effective population  
297 sizes were calculated in NeEstimator using the linkage disequilibrium method including  
298 all final selected SNP loci (Do et al., 2014). Here we present the results of the largest  
299 harmonic mean sample size per population.

300 To evaluate genetic structure among all sampled individuals, we performed a principal  
301 component analysis (PCA) as well as Bayesian clustering analysis. The PCA was  
302 computed in the *adegenet* package v. 2.0.1 in R (Jombart, 2008). We represent the  
303 eigenvalues of the analysis revealing the variance of each principal component and a  
304 scatterplot summarizing the genetic diversity including the center ellipses per sampling  
305 location. Clustering analysis was performed in Structure v.2.3.4 (Pritchard, Stephens, &  
306 Donnelly, 2000) under the admixture model with a 10% burn-in period and 500,000  
307 iterations of Markov Chain Monte Carlo (MCMC), which creates a probability  
308 distribution and allows for the evaluation of the likeliness of different numbers of clusters

309 (K) within the dataset. Ten replicates were run for each putative number of clusters (K)  
310 with K ranging from 1 to 11. The results were then passed through STRUCTURE  
311 HARVESTER v0.6.94 (Earl & vonHoldt, 2012) to apply the *ad hoc* statistic delta K  
312 proposed by Evanno and coauthors (2005). Resulting individual and population files  
313 were used in CLUMPP v1.1 (Jakobsson & Rosenberg, 2007) and DISTRICT v1.1  
314 (Rosenberg, 2003) to combine all STRUCTURE runs and visualize the results.

315

### 316 *Loci under selection*

317 As *A. dispar* individuals were found in very different habitat types (from desert ponds to  
318 the highly saline waters of the Red Sea) we tested for possible selection in any of the  
319 analyzed loci possibly indicating adaptive processes to the environmental conditions. For  
320 this we re-ran the *populations* program with the same whitelist of 5,955 loci selecting  
321 specific locations. First, all locations were used by defining all desert pond locations as  
322 one population and all seawater location as another one, in order to evaluate global  
323 selection between desert and seawater habitats. However, adaptive processes might differ  
324 for the different desert ponds and we therefore sub-selected locations. We evaluate  
325 adaptive loci for DP1 & DP2 against SW1 & SW2, DP3 vs. SW3, DP4 vs. SW4, and  
326 DP5 & DP6 against SW5. Each resulting vcf files was format converted with PGDSpider  
327 2.0.0.2 (Lischer & Excoffier, 2012). For outlier loci detection we used a Bayesian  
328 approach incorporated in Bayescan v2.1 (Foll & Gaggiotti, 2008). Briefly, posterior odds  
329 of a locus being under selection are obtained with MCMC with the help of the proportion  
330 of loci exhibiting large  $F_{ST}$  in comparison to other loci. To further minimize the number  
331 of false positives, the prior odds was increased to 100 (-pr\_odds 100). Outlier loci were

332 then visualized and selected in R after applying a False Discovery Rate (FDR) of 0.05.

333 Sequence reads for resulting putative loci under selection were then blasted against the

334 NCBI nr database (blastn) and successful blast hits are presented if the evalue was below

335  $1e^{-5}$ .

336



337 **Results**

338 *Pupfish locations, collection and pond properties*

339 Due to the lack of previous knowledge on the locations of the Arabian pupfish  
340 populations in western Saudi Arabia, we sampled 28 sites, of which only eleven had  
341 pupfish present (Figure 1). 12 Red Sea coastline sites and 16 inland enclosed ponds or  
342 streams were visited (Table 1 & Supplementary Table 1); 6 inland sites and 5 seawater  
343 sites had *Aphanius dispar* specimen. For two inland ponds, no sonde measurements could  
344 be obtained due to complications transporting the CTD (conductivity, temperature and  
345 depth) sonde into the steep canyons. Five ponds contained freshwater with a salinity  
346 upper maximum threshold of 0.5 ppt, whereas salinity in the other nine measured ponds  
347 ranged from 0.54 to 1.45 ppt. Most of the ponds therefore consisted of brackish water.  
348 *Aphanius dispar* was only found in ponds with salinities higher than 0.74 ppt. pH ranged  
349 between 7.71 to 9.41 across all sites, with the majority exhibiting a pH between 8 and 9.  
350 The average temperature in the inland ponds was 28.9 °C ( $\pm 4.9$  SE), while in the Red Sea  
351 sites it was 21.9 °C ( $\pm 4.17$  SE). Sampling of fish was performed during the late boreal  
352 autumn and early winter months (i.e., November-January), hence during the period of  
353 lowest temperature of the year. The highest average water temperature, 38.4 °C, was  
354 observed at the Al Lith hot spring. At this site, pupfish live in higher temperatures in  
355 comparison to all other sites, as well as with larger water content of silica (80,470 ppb).  
356 These results illustrate the wide range of environments which pupfish populations are  
357 able to exploit along the Red Sea coast.

358

359 *Water stable isotopes*

360 To further understand environmental conditions of the six inland ponds inhabited by *A.*  
361 *dispar*, water samples were collected, and their stable oxygen and hydrogen isotopes  
362 measured (Supplementary Table 1). This can aid in understanding the source of the water  
363 in the desert pond and if evaporation occurs comparatively, which can indicate water  
364 flow or standing waters. A strong linear relationship between the  $\delta^2\text{H}$  and  $\delta^{18}\text{O}$  of these  
365 samples was observed, with a slope of 4.83. Supplementary Figure 2 shows the linear  
366 regression of measurements, with data exhibiting a low slope compared to the Global  
367 Meteoric Water Line (GMWL). The relatively low slope indicates samples were subject  
368 to significant evaporative enrichment (Gat, 1996; Gibson, Birks, & Edwards, 2008;  
369 Gibson & Reid, 2014). The linear relationship between  $\delta^2\text{H}$  and  $\delta^{18}\text{O}$  across all samples  
370 indicates a common water source derived from a single recharge event, with variability  
371 between samples caused by the degree of evaporative enrichment for each water pool.  
372 This is consistent with observations made at each site, with DP1 and DP2 being the two  
373 most stagnant ponds with the least oxygen and greatest  $\delta^2\text{H}$  and  $\delta^{18}\text{O}$  isotopic enrichment  
374 (Table 1).

375

### 376 *Streamflow mapping*

377 The overall topography of the study region is a mountainous inland region that is  
378 bounded to the east by the Arabian shield, and which drains westward to a flatter desert  
379 terrain towards the Red Sea coastline. In order to understand the hydrology of the area  
380 and the exact hydrological constraints for the Arabian pupfish we created streamflow  
381 maps for each sample location derived from a satellite-based digital elevation model.  
382 Using the derived stream networks, a total of 6 different migration pathways were

383 identified within the study area (Figure 2 & Supplementary Table 4). Figure 2 illustrates  
384 the digital elevation model (DEM) based hydrological connectivity as streamlines  
385 flowing from each of the desert site locations where pupfish were present. We find that  
386 during periods of occasionally intense or sustained rainfall, the desert ponds may become  
387 hydrologically connected to their downstream saltwater location through tributary and  
388 main stem water flow. Four distinct areas of potential hydrological connectivity can be  
389 determined from Figure 2. In the northern portion of our study region, water from DP1  
390 and DP2 are hydrologically linked via defined streamlines to SW1. SW2 serves as a  
391 regional seawater sample pair for SW1, as it is separated by a distance of approximately  
392 40 km. Further south, there is delineated connectivity between DP3 and SW3, as well as  
393 between DP4 and SW4. In the southernmost part of the sampling area, DP6 has a  
394 tributary stream that connects with SW5, while DP5 has a separate watercourse to the  
395 sea. It is important to note that these streamlines do not represent active flow paths, as  
396 Saudi Arabia has no permanent rivers. Instead, the streamlines describe either  
397 permanently or intermittently dry riverbeds, defined as a function of the topography, with  
398 ephemeral flows only occurring in cases of sufficient rainfall.

399

#### 400 *RAD-sequencing*

401 In order to verify the potential hydrological connectivity for the Arabian pupfish, we use  
402 Single Nucleotide Polymorphism (SNPs) genetic markers to evaluate the genetic  
403 population connectivity of *Aphanius dispar*. For this we genotyped between 28 and 30  
404 individuals per site for the eleven *A. dispar* locations by means of RAD-sequencing  
405 (Table 2 & Supplementary Table 2). Over 2 million sequence reads were obtained on

406 average for each individual. Six samples were removed from further analysis as they had  
407 fewer than 300,000 reads after demultiplexing and quality trimming, resulting in 27 to 30  
408 individual samples per location. The total final sample number was 314 individuals for 11  
409 sites (five saltwater and six desert pond localities) (Figure 1). A total of 690,084 putative  
410 single nucleotide polymorphisms (SNPs) were obtained with STACKS (Catchen et al.,  
411 2013), which were stringently filtered to a final 5,955 SNP loci. The average depth of  
412 coverage for these loci was 48x, with a minimum of 24x and an average minor allele  
413 frequency of 0.21 (Supplementary Figures 4 & 5).

414

#### 415 *Population genomics*

416 The number of alleles across the 5,955 SNP loci ranged from 1.3 to 1.8 for the different  
417 locations (Table 2). Heterozygosity revealed lower levels for desert ponds and  
418 particularly for desert pond DP4 the lowest heterozygosity among all locations, while  
419 also having a negative inbreeding coefficient ( $F_{IS}$ ). DP4 also exhibited the most private  
420 alleles (27) followed by DP1 with 15 and SW2 with 13. Three seawater locations SW3-  
421 SW5 had no private alleles. Pairwise genetic distance between populations ( $F_{ST}$ ) was  
422 highest for DP4, with almost all values above 0.2 and the closest genetic distance with  
423 SW4 (Figure 3). The lowest value (0) was observed for DP1 and DP2. Interestingly, most  
424 DP locations showed higher  $F_{ST}$  values when compared to other DP localities than with  
425 SW locations, indicating a clear disconnection between desert pond sites. Exceptions to  
426 this include DP5 and DP6, with an  $F_{ST}$  value of 0.048. Pairwise  $F_{ST}$  comparisons between  
427 seawater localities ranged between 0.005 to a maximum of 0.105 (SW2 vs SW5).

428 Effective population size ranged between a very low 51 in DP4 to nearly 6,000 in SW2  
429 (Table 2). DP3 was the only other site with an effective size below 1,000.  
430 Bayesian clustering and *ad hoc* testing allowed for the approximation of the most likely  
431 number of clusters within the analyzed samples. The most probable cluster numbers were  
432 2 or 8, but delta K *ad hoc* testing also showed a peak at K=4 (Supplementary Figure 6).  
433 K=2 divides the northern localities (DP1, DP1& SW1, SW2) from the southern sites,  
434 with DP3 and SW3 being an admixed group. When considering four different genetic  
435 units in our data set, a division from north to south is found, combining desert ponds and  
436 seawater locations together into clusters (Figure 4). In this scenario, DP4 stands out as the  
437 only locality with its own cluster. SW4 in turn seems to have the most genetically  
438 admixed individuals of all locations. By increasing the cluster number to 8, a further  
439 subdivision in the northern part can be found, separating the two desert ponds from the  
440 seawater locations (DP1 & DP2 and SW1 and SW2). Here SW4 and SW5, the two  
441 furthest southern seawater sites, appear to share some unique traits (represented by the  
442 yellow cluster in Figure 4b), which are not shared with the southern desert ponds.

443

#### 444 *Hydrological and genetic connectivity*

445 The population clustering in the principal component analysis revealed a break between  
446 the four northern locations (SW1, SW2, DP1 and DP2) and the seven southern ones,  
447 regardless of them being desert ponds or seawater sites (Figure 5a). The two desert  
448 ponds DP1 and DP2 closely clustered together as well as the two seawater locations  
449 (SW1 and SW2), with some distance between the two different environments. This

450 disjunction, however, is not seen through hydrological mapping, as DP1 & DP2 have  
451 hydrological connectivity to SW1.

452

453 Since annual rainfall volume tends to increase from the north towards the south (i.e.  
454 heavier and more frequent rainfalls towards the south (El Kenawy & McCabe, 2016)), the  
455 likelihood of genetic connectivity might also be expected to increase amongst the  
456 southern sample sites. In fact, with the exception of DP4, a decrease in genetic distance  
457 between locations from the northern area to the south one was found. Moreover, in the  
458 southern parts of the study area, less genetic distance was found between desert pond and  
459 the nearest seawater location (DP3 with DP4; DP4 with SW4 as well as DP5, DP6 and  
460 SW5). This is in accordance with the hydrological map, where water flow is possible  
461 from the desert pond sites to the respective wadi (ephemeral river systems appearing  
462 during intense rain periods) outlets in the Red Sea. It is not unusual for significant flow  
463 events or even flash-floods to occur on an annual, or multi-annual basis (Deng et al.,  
464 2015), potentially providing the mechanism behind the observed genetic connectivity  
465 within the population clusters. When evaluating the third principal component, large  
466 genetic distance between DP4 and most other locations becomes apparent (Figure 5b).

467

#### 468 *Putative environmental selection*

469 Possible selective processes to different environmental condition were evaluated using an  
470  $F_{ST}$  outlier approach. All desert pond locations were grouped together and compared with  
471 all seawater locations, resulting in five outlier loci (Table 3). Based on the population  
472 genetic analyses, subsets of desert ponds and genetically close seawater locations were

473 evaluated separately as well. In the northern part, the analysis included two desert ponds  
474 (Desert Pond (DP)1 & DP2) and two seawater locations together (Sea Water (SW) 1 &  
475 SW2), and resulted in one outlier loci which was also detected during an analysis that  
476 included all sites. The comparison of DP4 and SW4 resulted also in one outlier.  
477 Comparing DP3 and SW3 recovered one locus only, whereas the three southernmost  
478 locations exhibited ten outliers. There is no common overlapping outlier loci detected  
479 among the independent salt versus desert pond comparisons. Out of the 21 unique outliers  
480 detected in the different subsets of data, 10 could be successfully identified by homology  
481 using BLAST, and include several genes involved in immune response and ion channels.  
482 The list of NCBI description and accession number can be found in Table 3.

483

#### 484 *Muscle tissue stable isotopes*

485 To investigate further into differences between locations and environmental influence on  
486 *A. dispar* we analyzed nitrogen and carbon stable isotopes in fish white muscle tissues.  
487 These analyses revealed a clear separation between pupfish from inland ponds and  
488 saltwater Red Sea habitats (Figure 6). The mean values for  $\delta^{13}\text{C}$  and  $\delta^{15}\text{N}$  for desert pond  
489 fish (DP) ranged between -21.49‰ and -26.28‰ (SD: 2.39‰ to 3.82‰) and 12.63‰ and  
490 21.03‰ (SD: 1.62‰ to 4.31‰), respectively. Saltwater fish (SW) isotope mean values  
491 ranged between -6.13‰ and -11.62‰ for  $\delta^{13}\text{C}$  (SD: 1.21‰ to 1.58‰) and between  
492 5.92‰ and 10.90‰ for  $\delta^{15}\text{N}$  (SD: 0.61‰ to 1.25‰). Overall, DP sites were more  
493 depleted in  $\delta^{13}\text{C}$  than SW, but had the highest values of  $\delta^{15}\text{N}$ . The isotopic signatures of  
494  $\delta^{13}\text{C}$  and  $\delta^{15}\text{N}$  correlated significantly ( $p < 0.0001$ ,  $\rho = -0.85$ ). While gender did not result  
495 in a significant covariate ( $p > 0.05$ ), fish length was significantly correlated with both

496  $\delta^{13}\text{C}$  ( $p < 0.0001$ ,  $\rho = -0.39$ ) and  $\delta^{15}\text{N}$  ( $p = 0.0002$ ,  $\rho = 0.32$ ) values. Our data did not  
497 pass the normality test (Shapiro-Wilk test,  $p < 0.0001$ ) nor the homoscedasticity test  
498 (Fligner-Killeen test,  $\delta^{13}\text{C}$   $p = 0.0003$ ;  $\delta^{15}\text{N}$   $p < 0.0001$ ). For these reasons, to test the  
499 differences between DP and SW isotope contents correcting for fish size, a nonparametric  
500 ANCOVA was used. There was a strong water type effect on both  $\delta^{13}\text{C}$  and  $\delta^{15}\text{N}$  fish  
501 content ( $p < 0.0001$ ). When testing the differences within clusters (cluster 1:  $\delta^{13}\text{C}$   $p =$   
502  $0.0037$ ,  $\delta^{15}\text{N}$   $p = 0.0039$ ; cluster 2:  $\delta^{13}\text{C}$   $p = 0.0385$ ,  $\delta^{15}\text{N}$   $p = 0.0352$ ; cluster 3:  $\delta^{13}\text{C}$   $p =$   
503  $0.0370$ ;  $\delta^{15}\text{N}$   $p = 0.0350$ ; cluster 4:  $\delta^{13}\text{C}$   $p = 0.0121$ ;  $\delta^{15}\text{N}$   $p = 0.0141$ ), the same result  
504 was obtained, with a strong segregation between saltwater and desert pond samples,  
505 irrespective of geographic proximity. When comparing between desert ponds, DP3 is  
506 significantly different from all other ponds for  $\delta^{13}\text{C}$  ( $p = 0.0064$ ) and DP4 has a  
507 significantly larger  $\delta^{15}\text{N}$  than the other ponds ( $p=0.0239$ ). Muscle tissue isotopes  
508 analysis therefore suggests that fish in the desert pond have different diets and therefore  
509 different ecological niches relative to the populations from the Red Sea coast and some  
510 desert ponds have distinct isotope signatures in comparison to other desert ponds.  
511



## 512 **Discussion**

513 Our sampling of *Aphanius dispar* along the Red Sea coastline of the Arabian Desert  
514 provides insight to previously uncharacterized sites hosting populations in both near-  
515 freshwater water ponds as well as in sheltered coastal marine habitats. In contrast to the  
516 often ephemeral habitats occupied by the African turquoise killifish, *Nothobranchius*  
517 *furzeri* (Furness, 2016), the survival and persistence of the Arabian pupfish seems to  
518 depend on constant groundwater discharge and irregular rainfall events. Hydrological  
519 mapping and genetic analyses reveal that due to sporadic flash floods occurring in the  
520 region (Deng et al., 2015) fish may literally be washed from desert ponds out to the Red  
521 Sea. The genetic population units comprised an admixture of pupfish from the two  
522 different environments, desert pond and seawater individuals. We detected four main  
523 genetic clusters, which mostly grouped desert fish with Red Sea individuals based on a  
524 latitudinal gradient. Due to little hydrological connectivity among desert ponds, pupfish  
525 from the desert (or ‘oases’) are alternately rapidly carried out to very different  
526 environmental conditions in the Red Sea along wadis during flash flood events. The  
527 change in environmental condition is though not accompanied by population structure,  
528 contrary to many other study systems across different environmental gradients with  
529 populations differentiating with distance or environment (Sexton et al., 2014).

530

### 531 *Ecological acclimation*

532 Surviving a ‘washout’ event from a desert pond with less than 1 ppt in salinity to the  
533 highly saline Red Sea (with an average salinity of 43 ppt) requires a considerable  
534 acclimation capacity. Many killifish species are euryhaline and can tolerate large salinity

535 changes in the environment. *Fundulus heteroclitus* has been shown to undergo a large  
536 range of physiological changes, from drinking rates to changes in acid base regulation  
537 (Wood & Marshall, 1994). Nonetheless, *Fundulus* species, albeit tolerant to large salinity  
538 ranges, have diverged into species adapted to specific environmental conditions  
539 (Whitehead, 2010). Interestingly, we found the same genetic populations of *A. dispar*  
540 living in both desert ponds and seawater. The hypothesized saltwater evolutionary origin  
541 of the *Aphanius* genus<sup>19</sup> provides a potential explanation for the tolerance of *A. dispar*  
542 when moved from near-freshwater ponds to a highly saline environment. However, it is  
543 not just temperature and salinity that differ between the desert ponds and the Red Sea  
544 coastal environments. We also see an ecological divergence in tissue stable isotopes  
545 between desert and seawater sites, even from within the same genetic population unit.  
546 The seawater fish muscle tissues were depleted in <sup>15</sup>N and more enriched in <sup>13</sup>C than their  
547 freshwater counterparts. Similar signatures have previously been found when comparing  
548 freshwater and saltwater fish, although the fish species in each of the environments  
549 differed (Fuller et al., 2012; Robson et al., 2016). Similarly, for anadromous species such  
550 as salmon that travel from fresh to saltwater, an increase in <sup>13</sup>C is exhibited when resident  
551 in seawater habitats (Litz et al., 2017). Higher levels of <sup>15</sup>N, found here for the desert  
552 ponds, is often correlated with higher trophic hierarchy levels (Zanden & Rasmussen,  
553 1999). For *A. dispar*, however, it is difficult to isolate the potential influences of habitat-  
554 related variability in the basal isotopic values of the food web from the potential trophic  
555 shifts (McMahon, Hamady, & Thorrold, 2013; Post, 2002).

556

557 *Genetic divergence*

558 Environmental differences leading to ecological divergence can drive adaptation and  
559 eventually speciation (Arnegard et al., 2014). Despite large ecological difference in prey  
560 and habitat niche, there is little genetic difference between the desert pond fish and the  
561 geographically-corresponding seawater fish. This could give a hint that ‘washout events’  
562 occur frequently enough to create enough migration from the desert ponds to the seawater  
563 sites, or that, as previously shown in other killifish species (Whitehead, Roach, Zhang, &  
564 Galvez, 2012), the Arabian killifish has a large capacity for rapid and long-lasting plastic  
565 responses to environmental change. We found only five putative outlier single nucleotide  
566 loci that could be under selection between all desert pond inhabitants and seawater fish,  
567 and only three that can be functionally annotated. Perforin 1 (*prf1*), a gene to which one  
568 of the outliers was successfully blasted (see Table 3), has key functions in the immune  
569 response and forms part of killer T-cells, indicating a potential adaptive change to the  
570 highly saline environment in the Red Sea. This particular function has been seen to be  
571 conserved in many fish species (Nakanishi, Toda, Shibasaki, & Somamoto, 2011; Toda,  
572 Araki, Moritomo, & Nakanishi, 2011). Interestingly, in wild salmon, perforin-mediated  
573 apoptotic processes were important in survival when migrating back to freshwater  
574 spawning grounds from seawater (Miller et al., 2011). Environmental changes are also  
575 associated with a SNP in the ATPase Family gene 3 (*atfg3*) previously attributed to stress  
576 and biosynthesis and with an increased expression in trout after a starvation period  
577 (Rescan et al., 2007). A hint towards its importance in seawater acclimation could be  
578 related to an increase in mitochondrion-rich cells and ATPase activity due to a  
579 physiological demand of acid-base and ion regulation in saltwater (Lee, Hwang, Shieh,  
580 & Lin, 2000).

581

582 One of the desert ponds, the Al Lith hot spring (site DP3), had high temperatures  
583 (>38°C) and a different chemical signature, such as a high amount of silica. Life in such  
584 hot water could potentially provoke adaptive signals in the genome. However, only one  
585 putative outlier was found for the inhabitants of the hot spring in comparison to other  
586 desert ponds. therefore hinting to phenotypic plasticity, as for the case of the Magadi  
587 tilapia (*Alcolapia grahami*). *Alcolapia grahami* lives in hot springs in Kenya and was  
588 recently described to have the highest upper critical temperature recorded for a fish (45.6  
589 °C (Wood et al., 2016)). Despite the extreme environmental conditions, genetic studies  
590 did not find population differences when compared to tilapia of less extreme  
591 environmental conditions at close proximity (Wilson et al., 2004; Zaccara et al., 2014).  
592 Low numbers of putative outlier SNPs were also detected, suggesting some ongoing gene  
593 flow and admixture (Ford et al., 2015), which could be the case for our *A. dispar* samples  
594 from the Al Lith hot spring. Despite the lack of loci under selection, connectivity between  
595 desert ponds is low and there is limited gene flow, as indicated by large genetic distances  
596 between the hot spring and other desert ponds, suggesting isolation and divergence  
597 between these habitats. For the pupfish in the hot spring, we could detect a differentiated  
598 ecological signature in tissue stable isotopes compared to the other desert ponds.  
599 Although contradicting the findings on the Magadi tilapia, where the hot spring site  
600 revealed carbon isotope tissue enrichment (Kavembe, Kautt, Machado-Schiaffino, &  
601 Meyer, 2016), *A. dispar* from the Al Lith hot spring have lower values of <sup>13</sup>C in their  
602 muscle tissue. One possible explanation for this result might be the turbidity of the hot

603 spring site, due to a large amount of suspended silica, as carbon stable isotope depletion  
604 was previously associated with turbidity in the environment (Nahon et al., 2013).

605

#### 606 *Anthropogenic impacts on desert fish populations*

607 Besides natural environmental conditions that are reflected in the isotopic signature of the  
608 pupfish, anthropogenic impacts can also be detected. In the case of DP4, we found an  
609 isotopic as well as genetic signature of human disturbance. Fish tissues here are more  $^{15}\text{N}$   
610 enriched in comparison to other locations, which indicates an accumulation of the heavier  
611 isotope element possibly due to isolation of this pond (Amundson et al., 2003; Szpak,  
612 2014). In this site, there is evidence of agricultural activity, most likely utilizing  
613 groundwater in the area, which in turn might lower the water table and disconnect this  
614 location from others. Furthermore, there is a dam structure 15 km upstream of DP4 most  
615 likely restricting the water availability downstream. Even if topographic mapping shows  
616 a hydrological connection between DP4 and SW4, it seems that human interference here  
617 inhibits any flow of water to the sea. This hypothesis would explain the genetic  
618 differentiation for this particular site, which seems to be undergoing a population  
619 bottleneck. The fish in this site have in fact an increased number of private alleles and  
620 low genetic diversity, indicated by low heterozygosity. Even though the inbreeding  
621 coefficient was is low, this result is most likely due to low genetic differentiation within  
622 the population used in the calculation. Pairwise kinship reveals most individuals within  
623 this site to be highly related, and the effective population size is very low. It therefore  
624 seems that use of water in this area has isolated this population, restricting its gene flow  
625 and its resilience.

626

627 In the northern part of the Saudi Arabian coast, *A. dispar* in desert ponds and saltwater  
628 locations do not cluster together genetically, as it is seen in the southern parts, albeit  
629 hydrological connectivity potential. Here the desert pond fish are genetically closer to  
630 each other, as are the seawater fish, with a clear division between desert and Red Sea  
631 sample sites. There are two plausible reasons for this disconnection. The northern regions  
632 receive less rainfall (El Kenawy & McCabe, 2016) and hence any hydrological  
633 connectivity between the desert and the sea will be much lower. The observed strong  
634 genetic divergence though is most likely caused by the ‘upstream’ construction of the  
635 Rabigh Dam (completed 2008), which was built for municipal water supply and flood  
636 control. Hence, even with rain events the water, and therefore the pupfish, can no longer  
637 reach the sea. For this reason, *A. dispar* populations are now diverging without the  
638 presence of gene flow through new migrants. A similar anthropogenic impact was found  
639 for desert fish of the Colorado River area, where natural flooding occurred regularly until  
640 the construction of dams that drastically changed the water availability and had a major  
641 impact on the distribution of desert fish (Hillyard, Podrabsky, & van Breukelen, 2015).

642

643 Fish living in desert regions have long been a conservation concern, with a large number  
644 of such species being under threat or endangered, often due to the expansion of desert  
645 agriculture and increasing global temperatures (Van Haverbeke et al., 2013). Although  
646 the Dead Sea subspecies (*A. dispar richardsoni*) is considered endangered (Goren, 2014),  
647 *A. dispar* itself is not considered to be endangered because it has stable populations  
648 widely distributed throughout the Arabian region (Freyhof, 2014). The species’ capacity

649 to acclimate and survive challenging environmental fluctuations likely plays a major role  
650 in its success in this region. However, our results show that despite the large capacity of  
651 *A. dispar* to acclimate and adapt to different environments and defy the constraints of  
652 living in restricted desert environments, anthropogenic water use can dramatically alter  
653 the population dynamics of the Arabian pupfish.  
654

655 References

- 656 Al-Kahem-Al-Balawi, H. F., Al-Ghanim, K. A., Ahmad, Z., Temraz, T. A., Al-Akel, A.  
657 S., Al-Misned, F., & Annazri, H. (2008). A threatened fish species (*Aphanius*  
658 *dispar*) in Saudi Arabia, a case study. *Pakistan Journal of Biological Sciences* □:  
659 *PJBS*, *11* (19), 2300–2307. Retrieved from  
660 <http://www.ncbi.nlm.nih.gov/pubmed/19137861>
- 661 Amundson, R., Austin, A. T., Schuur, E. A. G., Yoo, K., Matzek, V., Kendall, C., ...  
662 Baisden, W. T. (2003). Global patterns of the isotopic composition of soil and plant  
663 nitrogen. *Global Biogeochemical Cycles*, *17* (1).  
664 <https://doi.org/10.1029/2002GB001903>
- 665 Arnegard, M. E., McGee, M. D., Matthews, B., Marchinko, K. B., Conte, G. L., Kabir,  
666 S., ... Schluter, D. (2014). Genetics of ecological divergence during speciation.  
667 *Nature*, *511* (7509), 307–311. <https://doi.org/10.1038/nature13301>
- 668 Bennett, W. A., & Beitinger, T. L. (1997). Temperature Tolerance of the Sheepshead  
669 Minnow, *Cyprinodon variegatus*. *Copeia*, *1*, 77. <https://doi.org/10.2307/1447842>
- 670 Bolger, A. M., Lohse, M., & Usadel, B. (2014). Trimmomatic: a flexible trimmer for  
671 Illumina sequence data. *Bioinformatics (Oxford, England)*, *30*, 2114–2120.  
672 <https://doi.org/10.1093/bioinformatics/btu170>
- 673 Bouzat, J. L. (2010). Conservation genetics of population bottlenecks: the role of chance,  
674 selection, and history. *Conservation Genetics*, *11* (2), 463–478.  
675 <https://doi.org/10.1007/s10592-010-0049-0>
- 676 Bowman, A., & Azzalini, A. W. (2014). R package “sm”: nonparametric smoothing  
677 methods (version 2.2-5.4). Retrieved from <http://www.stats.gla.ac.uk/~adrian/sm>,  
678 [http://azzalini.stat.unipd.it/Book\\_sm](http://azzalini.stat.unipd.it/Book_sm)
- 679 Catchen, J., Hohenlohe, P. A., Bassham, S., Amores, A., & Cresko, W. A. (2013).  
680 Stacks: an analysis tool set for population genomics. *Molecular Ecology*, *22* (11),  
681 3124–3140. <https://doi.org/10.1111/mec.12354>
- 682 Danecek, P., Auton, A., Abecasis, G., Albers, C. A., Banks, E., DePristo, M. A., ...  
683 Durbin, R. (2011). The variant call format and VCFtools. *Bioinformatics*, *27* (15),  
684 2156–2158. <https://doi.org/10.1093/bioinformatics/btr330>
- 685 Deng, L., McCabe, M. F., Stenichikov, G., Evans, J. P., Kucera, P. A., Deng, L., ...  
686 Kucera, P. A. (2015). Simulation of Flash-Flood-Producing Storm Events in Saudi  
687 Arabia Using the Weather Research and Forecasting Model. *Journal of*  
688 *Hydrometeorology*, *16* (2), 615–630. <https://doi.org/10.1175/JHM-D-14-0126.1>
- 689 Do, C., Waples, R. S., Peel, D., Macbeth, G. M., Tillett, B. J., & Ovenden, J. R. (2014).  
690 NeEstimator v2: re-implementation of software for the estimation of contemporary  
691 effective population size ( $N_e$ ) from genetic data. *Molecular Ecology Resources*,  
692 *14* (1), 209–214. <https://doi.org/10.1111/1755-0998.12157>
- 693 Doebeli, M., & Dieckmann, U. (2003). Speciation along environmental gradients.  
694 *Nature*, *421* (6920), 259–264. <https://doi.org/10.1038/nature01274>
- 695 Earl, D. A., & vonHoldt, B. M. (2012). STRUCTURE HARVESTER: a website and  
696 program for visualizing STRUCTURE output and implementing the Evanno  
697 method. *Conservation Genetics Resources*, *4* (2), 359–361.  
698 <https://doi.org/10.1007/s12686-011-9548-7>
- 699 Ehrich, D., Tarroux, A., Stien, J., Lecomte, N., Killengreen, S., Berteaux, D., & Yoccoz,



- 700 N. G. (2011). Stable isotope analysis: modelling lipid normalization for muscle and  
701 eggs from arctic mammals and birds. *Methods in Ecology and Evolution*, 2 (1), 66–  
702 76. <https://doi.org/10.1111/j.2041-210X.2010.00047.x>
- 703 El Kenawy, A. M., & McCabe, M. F. (2016). A multi-decadal assessment of the  
704 performance of gauge- and model-based rainfall products over Saudi Arabia:  
705 climatology, anomalies and trends. *International Journal of Climatology*, 36 (2),  
706 656–674. <https://doi.org/10.1002/joc.4374>
- 707 Evanno, G., Regnaut, S., & Goudet, J. (2005). Detecting the number of clusters of  
708 individuals using the software STRUCTURE: a simulation study. *Molecular*  
709 *Ecology*, 14 (8), 2611–2620. <https://doi.org/10.1111/j.1365-294X.2005.02553.x>
- 710 Fisher, S. G., Gray, L. J., Grimm, N. B., & Busch, D. E. (1982). Temporal Succession in  
711 a Desert Stream Ecosystem Following Flash Flooding. *Ecological Monographs*, 52  
712 (1), 93–110. <https://doi.org/10.2307/2937346>
- 713 Foll, M., & Gaggiotti, O. (2008). A Genome-Scan Method to Identify Selected Loci  
714 Appropriate for Both Dominant and Codominant Markers: A Bayesian Perspective.  
715 *Genetics*, 180 (2). Retrieved from <http://www.genetics.org/content/180/2/977>
- 716 Ford, A. G. P., Dasmahapatra, K. K., Rüber, L., Gharbi, K., Cezard, T., & Day, J. J.  
717 (2015). High levels of interspecific gene flow in an endemic cichlid fish adaptive  
718 radiation from an extreme lake environment. *Molecular Ecology*, 24 (13), 3421–  
719 3440. <https://doi.org/10.1111/MEC.13247>
- 720 Freyhof, J. (2014). *Aphanius dispar*.
- 721 Fuller, B. T., Müldner, G., Van Neer, W., Eryvynck, A., Richards, M. P., Cooremans, B.,  
722 ... Richards, M. P. (2012). Carbon and nitrogen stable isotope ratio analysis of  
723 freshwater, brackish and marine fish from Belgian archaeological sites (1st and 2nd  
724 millennium AD). *Journal of Analytical Atomic Spectrometry*, 27 (5), 807.  
725 <https://doi.org/10.1039/c2ja10366d>
- 726 Furness, A. I. (2016). The evolution of an annual life cycle in killifish: adaptation to  
727 ephemeral aquatic environments through embryonic diapause. *Biological Reviews*,  
728 91 (3), 796–812. <https://doi.org/10.1111/brv.12194>
- 729 Gaggiotti, O. E. (2003). Genetic threats to population persistence. *Ann. Zool. Fennici*, 40  
730 (40), 155–168. Retrieved from [http://www.annzool.net/PDF/anz40-free/anz40-](http://www.annzool.net/PDF/anz40-free/anz40-155.pdf)  
731 [155.pdf](http://www.annzool.net/PDF/anz40-free/anz40-155.pdf)
- 732 Gat, J. R. (1996). Oxygen and hydrogen isotopes in the hydrologic cycle. *Annual*  
733 *Review of Earth and Planetary Sciences*, 24 (1), 225–262.  
734 <https://doi.org/10.1146/annurev.earth.24.1.225>
- 735 Gibson, J. J., Birks, S. J., & Edwards, T. W. D. (2008). Global prediction of  $\delta_A$  and  $\delta^2$   
736 H-  $\delta^{18}$  O evaporation slopes for lakes and soil water accounting for seasonality.  
737 *Global Biogeochemical Cycles*, 22 (2), n/a-n/a.  
738 <https://doi.org/10.1029/2007GB002997>
- 739 Gibson, J. J., & Reid, R. (2014). Water balance along a chain of tundra lakes: A 20-year  
740 isotopic perspective. *Journal of Hydrology*, 519, 2148–2164.  
741 <https://doi.org/10.1016/j.jhydrol.2014.10.011>
- 742 Goren, M. (2014). *Aphanius dispar* ssp. *richardsoni*.
- 743 Haas, R. (1982). Notes on the ecology of *Aphanius dispar* (Pisces, Cyprinodontidae) in  
744 the Sultanate of Oman. *Freshwater Biology*, 12 (1), 89–95.  
745 <https://doi.org/10.1111/j.1365-2427.1982.tb00605.x>

- 746 Hillyard, S. D., Podrabsky, J. E., & van Breukelen, F. (2015). Desert Environments. In  
747 *Extremophile Fishes* (pp. 59–83). Cham: Springer International Publishing.  
748 [https://doi.org/10.1007/978-3-319-13362-1\\_4](https://doi.org/10.1007/978-3-319-13362-1_4)
- 749 Hopken, M. W., Douglas, M. R., & Douglas, M. E. (2013). Stream hierarchy defines  
750 riverscape genetics of a North American desert fish. *Molecular Ecology*, 22 (4),  
751 956–971. <https://doi.org/10.1111/mec.12156>
- 752 Hrbek, T., & Meyer, A. (2003). Closing of the Tethys Sea and the phylogeny of Eurasian  
753 killifishes (Cyprinodontiformes: Cyprinodontidae). *Journal of Evolutionary*  
754 *Biology*, 16 (1), 17–36. <https://doi.org/10.1046/j.1420-9101.2003.00475.x>
- 755 Jakobsson, M., & Rosenberg, N. A. (2007). CLUMPP: a cluster matching and  
756 permutation program for dealing with label switching and multimodality in analysis  
757 of population structure. *Bioinformatics*, 23 (14), 1801–1806.  
758 <https://doi.org/10.1093/bioinformatics/btm233>
- 759 Jombart, T. (2008). adegenet: a R package for the multivariate analysis of genetic  
760 markers. *Bioinformatics*, 24 (11), 1403–1405.  
761 <https://doi.org/10.1093/bioinformatics/btn129>
- 762 Kavembe, G. D., Franchini, P., Irisarri, I., Machado-Schiaffino, G., & Meyer, A. (2015).  
763 Genomics of Adaptation to Multiple Concurrent Stresses: Insights from  
764 Comparative Transcriptomics of a Cichlid Fish from One of Earth’s Most Extreme  
765 Environments, the Hypersaline Soda Lake Magadi in Kenya, East Africa. *Journal of*  
766 *Molecular Evolution*, 81 (3–4), 90–109. <https://doi.org/10.1007/s00239-015-9696-6>
- 767 Kavembe, G. D., Kautt, A. F., Machado-Schiaffino, G., & Meyer, A. (2016). Eco-  
768 morphological differentiation in Lake Magadi tilapia, an extremophile cichlid fish  
769 living in hot, alkaline and hypersaline lakes in East Africa. *Molecular Ecology*, 25  
770 (7), 1610–1625. <https://doi.org/10.1111/mec.13461>
- 771 Kelley, J. L., Peyton, J. T., Fiston-Lavier, A.-S., Teets, N. M., Yee, M.-C., Johnston, J.  
772 S., ... Denlinger, D. L. (2014). Compact genome of the Antarctic midge is likely an  
773 adaptation to an extreme environment. *Nature Communications*, 5, ncomms5611.  
774 <https://doi.org/10.1038/ncomms5611>
- 775 Lee, T. H., Hwang, P. P., Shieh, Y. E., & Lin, C. H. (2000). The relationship between  
776 ‘deep-hole’ mitochondria-rich cells and salinity adaptation in the euryhaline teleost,  
777 *Oreochromis mossambicus*. *Fish Physiology and Biochemistry*, 23 (2), 133–140.  
778 <https://doi.org/10.1023/A:1007818631917>
- 779 Lischer, H. E. L., & Excoffier, L. (2012). PGDSpider: an automated data conversion tool  
780 for connecting population genetics and genomics programs. *Bioinformatics*, 28 (2),  
781 298–299. <https://doi.org/10.1093/bioinformatics/btr642>
- 782 Litz, M. N. C., Miller, J. A., Copeman, L. A., Teel, D. J., Weitkamp, L. A., Daly, E. A.,  
783 & Claiborne, A. M. (2017). Ontogenetic shifts in the diets of juvenile Chinook  
784 Salmon: new insight from stable isotopes and fatty acids. *Environmental Biology of*  
785 *Fishes*, 100 (4), 337–360. <https://doi.org/10.1007/s10641-016-0542-5>
- 786 Martin, C. H., Crawford, J. E., Turner, B. J., & Simons, L. H. (2016). Diabolical survival  
787 in Death Valley: recent pupfish colonization, gene flow and genetic assimilation in  
788 the smallest species range on earth. *Proceedings of the Royal Society B: Biological*  
789 *Sciences*, 283 (1823), 20152334. <https://doi.org/10.1098/rspb.2015.2334>
- 790 McMahon, K. W., Hamady, L. L., & Thorrold, S. R. (2013). A review of  
791 ecogeochemistry approaches to estimating movements of marine animals.

- 792 *Limnology and Oceanography*, 58 (2), 697–714.  
793 <https://doi.org/10.4319/lo.2013.58.2.0697>
- 794 Meffe, G. K., & Vrijenhoek, R. C. (1988). Conservation Genetics in the Management of  
795 Desert Fishes. *Conservation Biology*, 2 (2), 157–169. [https://doi.org/10.1111/j.1523-](https://doi.org/10.1111/j.1523-1739.1988.tb00167.x)  
796 [1739.1988.tb00167.x](https://doi.org/10.1111/j.1523-1739.1988.tb00167.x)
- 797 Meirmans, P. G., & Van Tienderen, P. H. (2004). Genotype and Genodive: two  
798 programs for the analysis of genetic diversity of asexual organisms. *Molecular*  
799 *Ecology Notes*, 4 (4), 792–794. <https://doi.org/10.1111/j.1471-8286.2004.00770.x>
- 800 Miller, K. M., Li, S., Kaukinen, K. H., Ginther, N., Hammill, E., Curtis, J. M. R., ...  
801 Farrell, A. P. (2011). Genomic Signatures Predict Migration and Spawning Failure  
802 in Wild Canadian Salmon. *Science*, 331 (6014), 214–217.  
803 <https://doi.org/10.1126/science.1196901>
- 804 Moore, T. Y., Cooper, K. L., Biewener, A. A., & Vasudevan, R. (2017). Unpredictability  
805 of escape trajectory explains predator evasion ability and microhabitat preference of  
806 desert rodents. *Nature Communications*, 8 (1), 440. [https://doi.org/10.1038/s41467-](https://doi.org/10.1038/s41467-017-00373-2)  
807 [017-00373-2](https://doi.org/10.1038/s41467-017-00373-2)
- 808 Nahon, S., Richoux, N. B., Kolasinski, J., Desmalades, M., Ferrier Pages, C., Lecellier,  
809 G., ... Berteaux Lecellier, V. (2013). Spatial and Temporal Variations in Stable  
810 Carbon ( $\delta^{13}\text{C}$ ) and Nitrogen ( $\delta^{15}\text{N}$ ) Isotopic Composition of Symbiotic  
811 Scleractinian Corals. *PLoS ONE*, 8 (12), e81247.  
812 <https://doi.org/10.1371/journal.pone.0081247>
- 813 Nakanishi, T., Toda, H., Shibasaki, Y., & Somamoto, T. (2011). Cytotoxic T cells in  
814 teleost fish. *Developmental & Comparative Immunology*, 35 (12), 1317–1323.  
815 <https://doi.org/10.1016/j.dci.2011.03.033>
- 816 NASA Jet Propulsion Laboratory. (2009). ASTER Global Digital Elevation Model.  
817 <https://doi.org/10.5067/ASTER/ASTGTM.002>
- 818 Paul, D., Skrzypek, G., & Fórizs, I. (2007). Normalization of measured stable isotopic  
819 compositions to isotope reference scales – a review. *Rapid Communications in Mass*  
820 *Spectrometry*, 21 (18), 3006–3014. <https://doi.org/10.1002/rcm.3185>
- 821 Peterson, B. K., Weber, J. N., Kay, E. H., Fisher, H. S., & Hoekstra, H. E. (2012).  
822 Double Digest RADseq: An Inexpensive Method for De Novo SNP Discovery and  
823 Genotyping in Model and Non-Model Species. *PLoS ONE*, 7 (5), e37135.  
824 <https://doi.org/10.1371/journal.pone.0037135>
- 825 Post, D. M. (2002). Using Stable Isotopes to Estimate Trophic Position: Models, Methods  
826 and Assumptions. *Ecology*, 83 (3), 703–718. [https://doi.org/10.1890/0012-9658](https://doi.org/10.1890/0012-9658(2002)083[0703:USITET]2.0.CO;2)  
827 [\(2002\)083\[0703:USITET\]2.0.CO;2](https://doi.org/10.1890/0012-9658(2002)083[0703:USITET]2.0.CO;2)
- 828 Pritchard, J. K., Stephens, M., & Donnelly, P. (2000). Inference of population structure  
829 using multilocus genotype data. *Genetics*, 155 (2), 945–959. Retrieved from  
830 [http://www.pubmedcentral.nih.gov/articlerender.fcgi?artid=1461096&tool=pmcentr](http://www.pubmedcentral.nih.gov/articlerender.fcgi?artid=1461096&tool=pmcentrez&rendertype=abstract)  
831 [ez&rendertype=abstract](http://www.pubmedcentral.nih.gov/articlerender.fcgi?artid=1461096&tool=pmcentrez&rendertype=abstract)
- 832 Rescan, P.-Y., Montfort, J., Rallièrè, C., Le Cam, A., Esquerré, D., & Hugot, K. (2007).  
833 Dynamic gene expression in fish muscle during recovery growth induced by a  
834 fasting-refeeding schedule. *BMC Genomics*, 8 (1), 438.  
835 <https://doi.org/10.1186/1471-2164-8-438>
- 836 Robson, H. K., Andersen, S. H., Clarke, L., Craig, O. E., Gron, K. J., Jones, A. K. G., ...  
837 Heron, C. (2016). Carbon and nitrogen stable isotope values in freshwater, brackish

- 838 and marine fish bone collagen from Mesolithic and Neolithic sites in central and  
839 northern Europe. *Environmental Archaeology*, 21 (2), 105–118.  
840 <https://doi.org/10.1179/1749631415Y.0000000014>
- 841 Rosenberg, N. A. (2003). distruct: a program for the graphical display of population  
842 structure. *Molecular Ecology Notes*, 4 (1), 137–138. [https://doi.org/10.1046/j.1471-](https://doi.org/10.1046/j.1471-8286.2003.00566.x)  
843 [8286.2003.00566.x](https://doi.org/10.1046/j.1471-8286.2003.00566.x)
- 844 Rousset, F. (2008). genepop'007: a complete re-implementation of the genepop software  
845 for Windows and Linux. *Molecular Ecology Resources*, 8 (1), 103–106.  
846 <https://doi.org/10.1111/j.1471-8286.2007.01931.x>
- 847 Seeb, L. W., Waples, R. K., Limborg, M. T., Warheit, K. I., Pascal, C. E., & Seeb, J. E.  
848 (2014). Parallel signatures of selection in temporally isolated lineages of pink  
849 salmon. *Molecular Ecology*, 23 (10), 2473–2485. <https://doi.org/10.1111/mec.12769>
- 850 Sexton, J. P., Hangartner, S. B., & Hoffmann, A. A. (2014). Genetic isolation by  
851 environment or distance: which pattern of gene flow is most common? *Evolution*, 68  
852 (1), 1–15. <https://doi.org/10.1111/evo.12258>
- 853 Sharp, Z. (2007). *Principles of stable isotope geochemistry*. Pearson/Prentice Hall.
- 854 Szpak, P. (2014). Complexities of nitrogen isotope biogeochemistry in plant-soil  
855 systems: implications for the study of ancient agricultural and animal management  
856 practices. *Frontiers in Plant Science*, 5, 288.  
857 <https://doi.org/10.3389/fpls.2014.00288>
- 858 Toda, H., Araki, K., Moritomo, T., & Nakanishi, T. (2011). Perforin-dependent cytotoxic  
859 mechanism in killing by CD8 positive T cells in ginbuna crucian carp, *Carassius*  
860 *auratus langsdorfii*. *Developmental & Comparative Immunology*, 35 (1), 88–93.  
861 <https://doi.org/10.1016/j.dci.2010.08.010>
- 862 Van Haverbeke, D. R., Stone, D. M., Coggins, L. G., & Pillow, M. J. (2013). Long-Term  
863 Monitoring of an Endangered Desert Fish and Factors Influencing Population  
864 Dynamics. *Journal of Fish and Wildlife Management*, 4 (1), 163–177.  
865 <https://doi.org/10.3996/082012-JFWM-071>
- 866 Wang, I. J., & Bradburd, G. S. (2014). Isolation by environment. *Molecular Ecology*, 23  
867 (23), 5649–5662. <https://doi.org/10.1111/mec.12938>
- 868 Whitehead, A. (2010). The evolutionary radiation of diverse osmotolerant physiologies  
869 in killifish (*Fundulus* sp.). *Evolution*. [https://doi.org/10.1111/j.1558-](https://doi.org/10.1111/j.1558-5646.2010.00957.x)  
870 [5646.2010.00957.x](https://doi.org/10.1111/j.1558-5646.2010.00957.x)
- 871 Whitehead, A., Galvez, F., Zhang, S., Williams, L. M., & Oleksiak, M. F. (2011).  
872 Functional genomics of physiological plasticity and local adaptation in killifish. *The*  
873 *Journal of Heredity*, 102 (5), 499–511. <https://doi.org/10.1093/jhered/esq077>
- 874 Whitehead, A., Roach, J. L., Zhang, S., & Galvez, F. (2012). Salinity- and population-  
875 dependent genome regulatory response during osmotic acclimation in the killifish (*Fundulus heteroclitus*) gill, 1293–1305. <https://doi.org/10.1242/jeb.062075>
- 876
- 877 Wilson, P., Wood, C., Walsh, P., Bergman, A., Bergman, H., Laurent, P., & White, B.  
878 (2004). Discordance between Genetic Structure and Morphological, Ecological, and  
879 Physiological Adaptation in Lake Magadi Tilapia. *Physiological and Biochemical*  
880 *Zoology*, 77 (4), 537–555. <https://doi.org/10.1086/422054>
- 881 Wood, C. M., Brix, K. V., De Boeck, G., Bergman, H. L., Bianchini, A., Bianchini, L. F.,  
882 ... Ojoo, R. O. (2016). Mammalian metabolic rates in the hottest fish on earth.  
883 *Scientific Reports*, srep26990. <https://doi.org/10.1038/srep26990>

- 884 Wood, C. M., & Marshall, W. S. (1994). Ion Balance, Acid-Base Regulation, and  
885 Chloride Cell Function in the Common Killifish, *Fundulus heteroclitus*: A  
886 Euryhaline Estuarine Teleost. *Estuaries*, *17* (1), 34. <https://doi.org/10.2307/1352333>  
887 Zaccara, S., Crosa, G., Vanetti, I., Binelli, G., Harper, D. M., Mavuti, K. M., ... Britton,  
888 J. R. (2014). Genetic and morphological analyses indicate high population mixing  
889 in the endangered cichlid *Alcolapia* flock of East Africa. *Conservation Genetics*, *15*  
890 (2), 429–440. <https://doi.org/10.1007/s10592-013-0551-2>  
891 Zanden, M. J. Vander, & Rasmussen, J. B. (1999). Primary consumer  $\delta^{13}\text{C}$  and  $\delta^{15}\text{N}$   
892 and the trophic position of aquatic consumers. *Ecology*, *80* (4), 1395–1404.  
893 [https://doi.org/10.1890/0012-9658\(1999\)080\[1395:PCCANA\]2.0.CO;2](https://doi.org/10.1890/0012-9658(1999)080[1395:PCCANA]2.0.CO;2)  
894 Zanden, M. J. Vander, & Rasmussen, J. B. (2001). Variation in  $\delta^{15}\text{N}$  and  $\delta^{13}\text{C}$  trophic  
895 fractionation: Implications for aquatic food web studies. *Limnology and*  
896 *Oceanography*, *46* (8), 2061–2066. <https://doi.org/10.4319/lo.2001.46.8.2061>  
897  
898

899 **Acknowledgments**

900 This study was supported by the King Abdullah University of Science and Technology  
901 (KAUST). We are very grateful to the KAUST Coastal and Marine Resources Core Lab  
902 and KAUST Government Affairs for their support in finding desert ponds, obtaining  
903 permits and aiding in the field. We thank the KAUST Integrative Systems Biology  
904 Laboratory and the KAUST Biosciences Core Laboratory for support and assistance.

905

906 **Author contributions:** C.S. designed and managed the field collection. C.S, L.C.B &  
907 J.N. performed the sample collection. L.C.B. and J.N. with the supervision of C.S.  
908 prepared the samples for DNA sequencing and tissue isotope measurements. M.L.B.  
909 provided reagents. J.N. performed chemical water analyses and L.C.B. analyzed the  
910 tissue isotope data. S.D.P., Y.A.L. and M.F.M. created hydrological mapping and  
911 analyzed water isotopes. C.S. analyzed the sequencing data, performed population  
912 genetic analyses with help from J.S. and integrated all datasets. C.S. & T.R. wrote the  
913 paper; all authors provided input to and approved the final version of the manuscript.

914

915 **Additional information:**

916 Raw sequencing data have been deposited on NCBI under BioProject ID PRJNA311159.  
917 Final SNP vcf file is available as Supplementary Material. Correspondence and requests  
918 for materials should be addressed to T.R. or C.S.

919

920 **Competing interests**

921 The authors declare no competing interests.

922 Figure legends

923 Figure 1: Locations of all sampling sites over a 1,100 km stretch of the Saudi Arabian  
924 coastline. Grey circles represent desert ponds without the presence of *Aphanius dispar*.  
925 Sites with pupfish are colored (n=11) and classified as desert ponds (DP) or seawater  
926 lagoons (SW). The top two pictures show a male and female *A. dispar*, respectively. The  
927 center picture is an example of a desert pond (DP2), below which is the Al Lith hotspring  
928 (DP3). The bottom picture shows an example of a seawater site (SW4). The map was  
929 created using ArcGIS 10.5 ([www.arcgis.com](http://www.arcgis.com)).

930

931 Figure 2: Hydrological modeling. Latitudinal 2D overview of Saudi Arabian coastline  
932 with *Aphanius dispar* collection sites indicated with fish icons (left) and 3D close-ups on  
933 three regions with predicted hydrological flow. Maps were produced with Google Earth  
934 imagery (Google Earth 7.1.2.2041; December 31, 2016) and ArcGIS 10.5 software  
935 ([www.arcgis.com](http://www.arcgis.com)).

936

937 Figure 3: Heatmap of  $F_{ST}$  values of pairwise population comparisons based on 5,955  
938 SNPs. Location abbreviations as in Table 1 (DP=desert pond, SW=seawater).

939

940 Figure 4: *Aphanius dispar* population structure with a)  $K=4$  and b)  $K=8$ . Each individual  
941 in the different sites (y-Axis) are plotted with colours representing the probability of each  
942 individual to be assigned to a certain cluster.

943

944 Figure 5: Scatterplot of principal component analysis evaluating the genetic structure  
945 between all analyzed *Aphanius dispar* individuals based on 5,955 loci. Eigenvalues  
946 represent the amount of genetic diversity shown by each principal component. a) PCA of  
947 principal components 1 and 2. b) PCA of principal components 1 and 3.

948

949 Figure 6: Ratio of stable isotopes of carbon and nitrogen in muscle tissue of *Aphanius*  
950 *dispar*, including fish from brackish water ponds and saltwater in the Red Sea. Error bars  
951 represent the standard error per location

952



953 Table 1: Sampling locations, characteristics and selected water parameters (for full water  
 954 measurements refer to Supplementary Table 1) measured by CTD or Aquakem. A dash  
 955 indicates that no reliable measurement was obtained.

| Site | Type       | Temperature (°C) | Conductivity (µS/cm) | Salinity (ppt) | O2 (ppm) | pH   | Chlorides (ppm) | Silica (ppb) | pupfish present |
|------|------------|------------------|----------------------|----------------|----------|------|-----------------|--------------|-----------------|
| SW5  | Sea        | 21.77            | 58,340.47            | 41.93          | 2.87     | 8.71 | 27.10           | 306.02       | yes             |
| SW4  | Sea        | 27.90            | 66,952.99            | 42.75          | 3.39     | 9.01 | 29.59           | 314.61       | yes             |
| SW3  | Sea        | 22.82            | 58,685.99            | 41.19          | 4.40     | 9.10 | 2.15            | 104.57       | yes             |
| SW2  | Sea        | 24.80            | 64,966.91            | 44.20          | 3.43     | 8.37 | 36,677.27       | 517.96       | yes             |
| SW1  | Sea        | 20.90            | 59,185.03            | 43.49          | 3.93     | 8.37 | 36.06           | 31.97        | yes             |
| DP6  | Pond       | 31.42            | 1,663.76             | 0.74           | 7.75     | 9.41 | 282.41          | 34,511.49    | yes             |
| DP5  | Pond       | 30.93            | 1,760.39             | 0.79           | 8.32     | 9.39 | 294.11          | 59,944.24    | yes             |
| DP4  | Pond       | 26.44            | 2,004.49             | 0.99           | 6.14     | 8.31 | 278.57          | 63,358.87    | yes             |
| DP3  | Hot Spring | 38.42            | 1,916.49             | 0.75           | 5.16     | 8.20 | 361.21          | 80,469.67    | yes             |
| DP2  | Pond       | 31.58            | 3,190.00             | 1.45           | 4.35     | 8.31 | 734.37          | 38,017.18    | yes             |
| DP1  | Pond       | 29.93            | 1,720.00             | 0.78           | 4.35     | 8.50 | 469.77          | 33,586.98    | yes             |
| 28   | Sea        | 27.65            | 64,108.41            | 40.93          | 3.32     | 8.46 | -               | -            | no              |
| 27   | Sea        | 21.77            | 65,110.01            | 47.50          | 3.81     | 8.21 | -               | -            | no              |
| 26   | Sea        | 18.18            | 51,228.77            | 39.44          | 4.56     | 8.40 | -               | -            | no              |
| 25   | Sea        | 22.60            | 57,621.28            | 40.54          | 3.61     | 8.48 | -               | -            | no              |
| 24   | Sea        | 12.08            | 46,285.24            | 41.12          | 4.11     | 8.29 | -               | -            | no              |
| 23   | Sea        | 21.74            | 63,528.52            | 46.35          | 3.86     | 8.24 | -               | -            | no              |
| 15   | Pond       | 21.28            | 5,825.19             | 0.31           | 6.00     | 8.60 | 76.24           | 20,016.72    | no              |
| 14   | Pond       | 21.15            | 8,023.78             | 0.43           | 3.10     | 7.71 | 115.34          | 38,414.86    | no              |
| 13   | Pond       | -                | -                    | -              | -        | -    | 103.07          | 5,016.26     | no              |
| 11   | Pond       | 28.91            | 898.74               | 0.41           | 6.33     | 8.04 | 86.54           | 38,664.80    | no              |
| 9    | Pond       | 33.54            | 1,025.76             | 0.43           | 6.26     | 9.15 | 127.94          | 52,096.62    | no              |
| 7    | Pond       | 30.21            | 1,257.23             | 0.56           | 4.49     | 8.05 | 196.26          | 76,975.60    | no              |
| 6    | Pond       | 28.31            | 1,164.95             | 0.54           | 4.69     | 8.34 | 128.02          | 46,885.01    | no              |
| 5    | Pond       | 30.25            | 879.72               | 0.39           | 4.26     | 8.11 | 135.60          | 25,711.03    | no              |
| 4    | Pond       | -                | -                    | -              | -        | -    | 29.70           | 10,464.11    | no              |
| 3    | Pond       | 21.60            | 1,019.11             | 0.54           | 5.32     | 8.25 | 166.66          | 45,331.00    | no              |

956

957

958 Table 2: Genetic metrics for all 11 pupfish locations for 5,955 SNP loci per sampling site.

959 N = number of individuals, Private a = number of private alleles, Na = average number of

960 alleles, Ho = observed heterozygosity, He = expected heterozygosity,  $F_{IS}$  = inbreeding

961 coefficient, Ne = effective population size, 95% CI = 95% confidence intervals for Ne,

962 mean r = average of pairwise kinship coefficient.

| <b>Location</b> | <b>N</b> | <b>Private a</b> | <b>Na</b> | <b>Ho</b> | <b>He</b> | <b><math>F_{IS}</math></b> | <b>Ne</b> | <b>95% CI</b> | <b>Mean r</b> |
|-----------------|----------|------------------|-----------|-----------|-----------|----------------------------|-----------|---------------|---------------|
| <b>DP1</b>      | 29       | 15               | 1.74      | 0.21      | 0.23      | 0.07                       | 1222      | 983-1614      | 0.22          |
| <b>DP2</b>      | 29       | 8                | 1.78      | 0.24      | 0.25      | 0.05                       | 1851      | 1256-3511     | 0.12          |
| <b>DP3</b>      | 28       | 6                | 1.57      | 0.17      | 0.19      | 0.07                       | 464       | 421-515       | 0.12          |
| <b>DP4</b>      | 27       | 27               | 1.31      | 0.08      | 0.08      | -0.02                      | 51        | 49-52         | 0.20          |
| <b>DP5</b>      | 28       | 4                | 1.53      | 0.16      | 0.17      | 0.06                       | 1497      | 1084-2416     | 0.25          |
| <b>DP6</b>      | 29       | 9                | 1.50      | 0.15      | 0.16      | 0.09                       | 1713      | 1236-2782     | 0.13          |
| <b>SW1</b>      | 28       | 7                | 1.80      | 0.24      | 0.27      | 0.08                       | 1149      | 882-1646      | 0.27          |
| <b>SW2</b>      | 29       | 13               | 1.80      | 0.23      | 0.26      | 0.09                       | 5910      | 2229-inf      | 0.06          |
| <b>SW3</b>      | 29       | 0                | 1.66      | 0.19      | 0.20      | 0.06                       | 1702      | 1199-2925     | 0.15          |
| <b>SW4</b>      | 30       | 0                | 1.77      | 0.20      | 0.22      | 0.10                       | 1645      | 1284-2286     | 0.19          |
| <b>SW5</b>      | 28       | 0                | 1.70      | 0.18      | 0.20      | 0.12                       | 3917      | 2175-19493    | 0.42          |

963

964

965 Table 3: Putative outlier loci between desert pond and red sea locations. Several pairwise  
 966 comparisons were performed, and the compared locations are indicated under “Locations  
 967 included”. Sequences were blasted again NCBI and only successful blast hits are listed.

| Locations included: DP | Locations included: SW | SNP loci included  | Number of outliers | SNP name   | NCBI description                                                                                     | Species of best blast hit                                | gene name | e-value  | coverage | NCBI accession |  |
|------------------------|------------------------|--------------------|--------------------|------------|------------------------------------------------------------------------------------------------------|----------------------------------------------------------|-----------|----------|----------|----------------|--|
| DP all                 | SW all                 | 4507               | 5                  | 19937_75   |                                                                                                      |                                                          |           |          |          |                |  |
|                        |                        |                    |                    | 35939_106  | perforin-1-like                                                                                      | <i>Salmo salar</i>                                       | perf      | 2.00E-05 | 86%      | XM_014185448.1 |  |
|                        |                        |                    |                    | 76967_58   |                                                                                                      |                                                          |           |          |          |                |  |
|                        |                        |                    |                    | 90197_26   | integrin alpha-6-like                                                                                | <i>Poecilia formosa</i><br><i>Nothobranchius furzeri</i> | itga6     | 3.00E-10 | 79%      | XM_016678011.1 |  |
|                        |                        |                    |                    | 112486_90  | AFG3-like protein 1                                                                                  | <i>furzeri</i>                                           | afg3      | 8.00E-30 | 95%      | XM_015952175.1 |  |
| DP1&DP2                | SW1&SW2                | 2449               | 1                  | 90197_30   | integrin alpha-6-like unchar. protein                                                                | <i>Poecilia formosa</i>                                  | itga6     | 3.00E-10 | 79%      | XM_016678011.1 |  |
| DP1&DP2                | SW1                    | 2586               | 1                  | 126619_29  | K02A2.6-like                                                                                         | <i>Oreochromis niloticus</i>                             |           | 4.00E-08 | 75%      | XM_019364105.1 |  |
| DP1&DP2                | SW2                    | 2890               | 6                  | 26511_91   |                                                                                                      |                                                          |           |          |          |                |  |
|                        |                        |                    |                    | 33001_35   |                                                                                                      |                                                          |           |          |          |                |  |
|                        |                        |                    |                    | 76967_58   |                                                                                                      |                                                          |           |          |          |                |  |
|                        |                        |                    |                    | 90197_30   | integrin alpha-6-like                                                                                | <i>Poecilia formosa</i>                                  | itga6     | 3.00E-10 | 79%      | XM_016678011.1 |  |
|                        |                        |                    |                    | 107780_39  | potassium voltage-gated channel subfamily H member 2-like                                            | <i>Poecilia mexicana</i>                                 | kcnh2     | 0.003    | 70%      | XM_014994260.1 |  |
| DP3                    | SW3                    | 3704               | 1                  | 116615_106 | AFG3-like protein 1                                                                                  |                                                          |           | 8.00E-30 | 95%      | XM_015952175.1 |  |
| DP4                    | SW4                    | 2631               | 1                  | 112486_90  |                                                                                                      | <i>Nothobranchius furzeri</i>                            |           |          |          |                |  |
| DP5&DP6                | SW5                    | 3963               | 10                 | 19073_13   | immunoglobulin light chain genomic sequence                                                          | <i>Takifugu rubripes</i>                                 |           | 0.003    | 84%      | KU365392.1     |  |
|                        |                        |                    |                    | 20996_81   |                                                                                                      |                                                          |           |          |          |                |  |
|                        |                        |                    |                    | 39387_14   |                                                                                                      |                                                          |           |          |          |                |  |
|                        |                        |                    |                    | 62495_79   |                                                                                                      |                                                          |           |          |          |                |  |
|                        |                        |                    |                    | 63109_75   | v-rel avian reticuloendotheliosis viral oncogene homolog                                             | <i>Nothobranchius furzeri</i>                            | rel       | 1.00E-21 | 82%      | XM_015944097.1 |  |
|                        |                        |                    |                    | 67796_71   |                                                                                                      |                                                          |           |          |          |                |  |
|                        |                        |                    |                    | 68351_79   | piezo type mechanosensitive ion channel component 1 zinc finger MIZ domain-containing protein 1-like | <i>Nothobranchius furzeri</i>                            | piezo1    | 2.00E-05 | 73%      | XM_015945536.1 |  |
|                        |                        |                    |                    | 80013_20   | uncharacterized                                                                                      | <i>Astyanax mexicanus</i>                                | zbtb17    | 3.00E-22 | 89%      | XM_007235440.2 |  |
| 83760_40               | LOC103909955           | <i>Danio rerio</i> |                    | 5.00E-07   | 81%                                                                                                  | XM_017354508.1                                           |           |          |          |                |  |
|                        |                        |                    |                    | 89871_81   |                                                                                                      |                                                          |           |          |          |                |  |
| DP4                    | SW all                 | 4761               | 1                  | 19939_80   |                                                                                                      |                                                          |           |          |          |                |  |

968

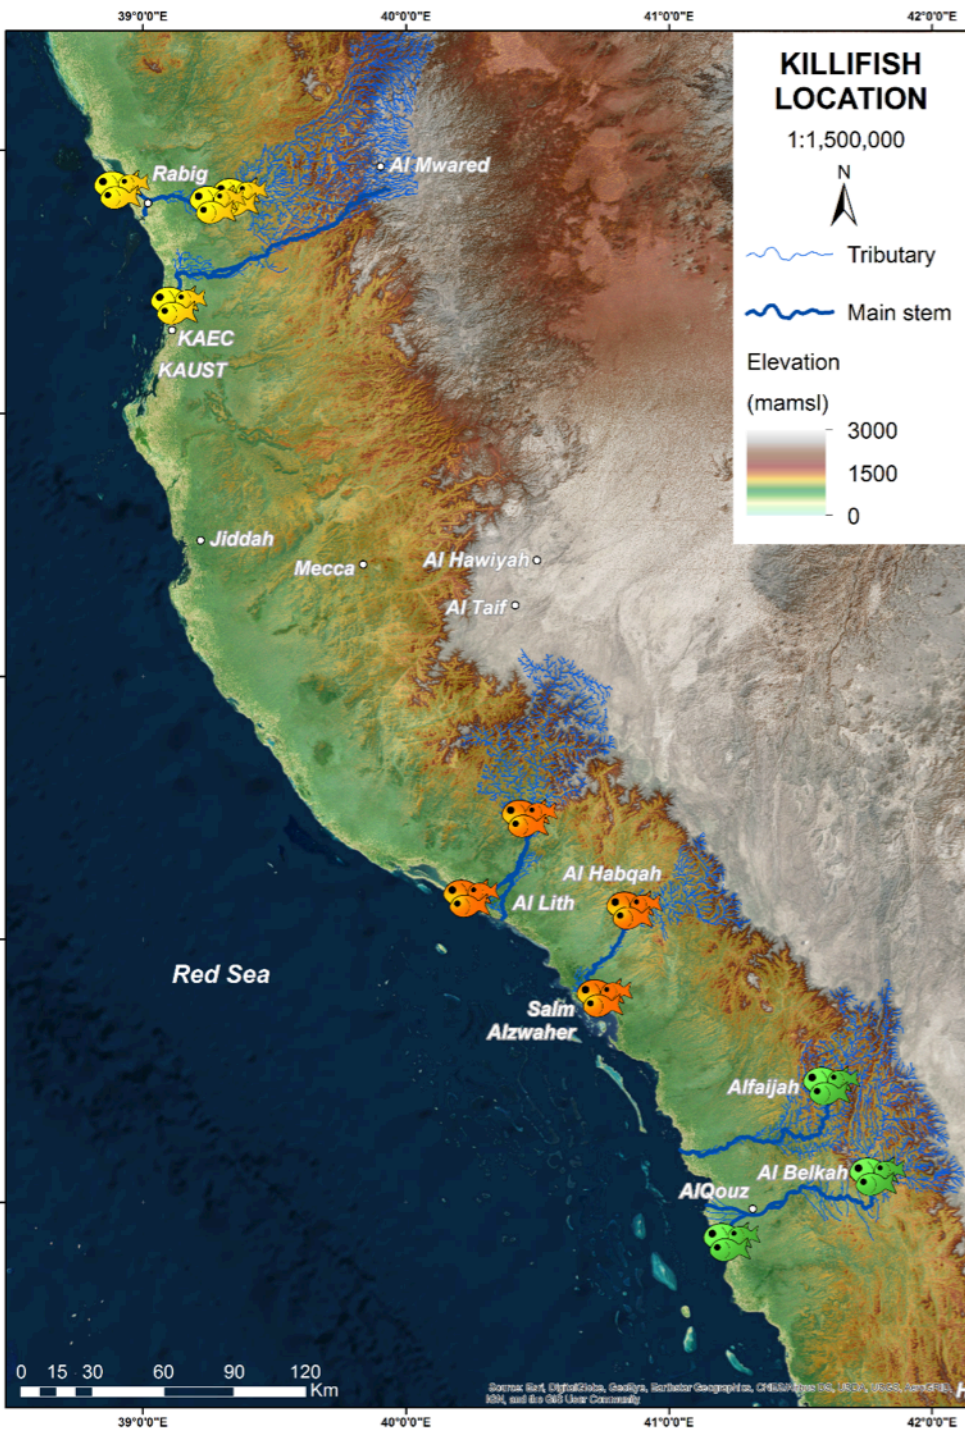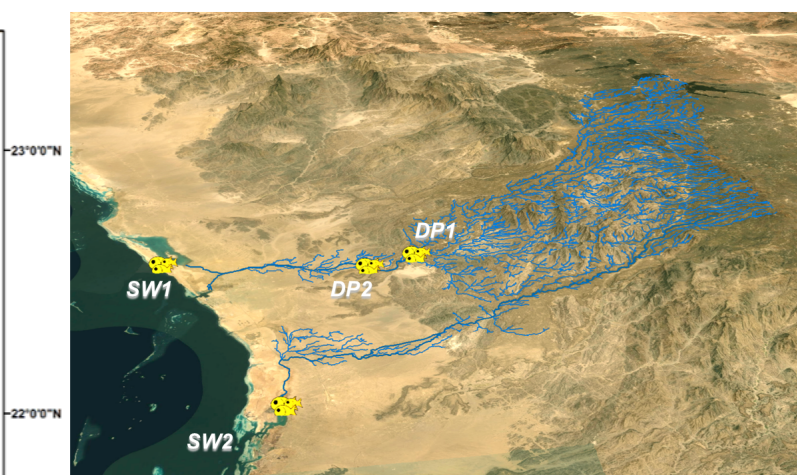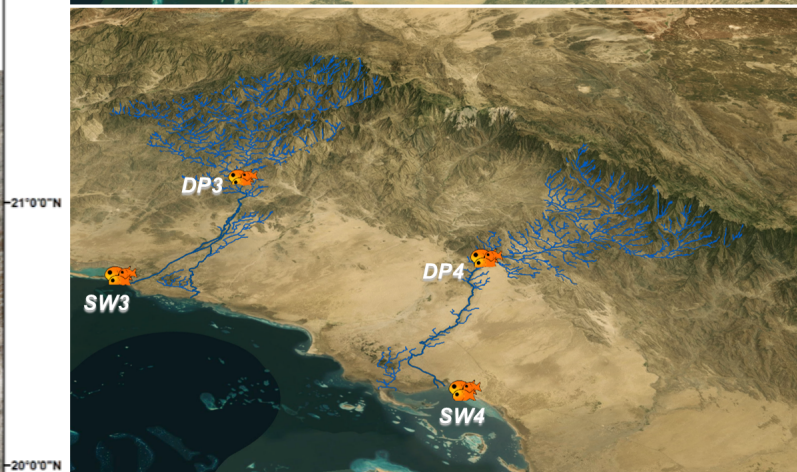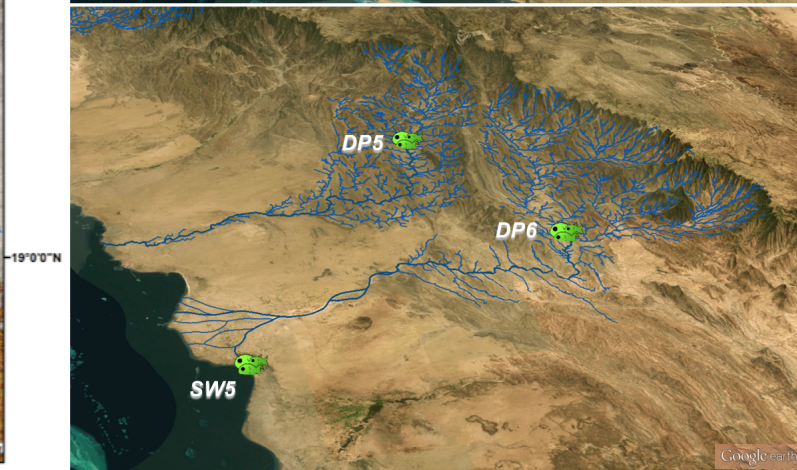

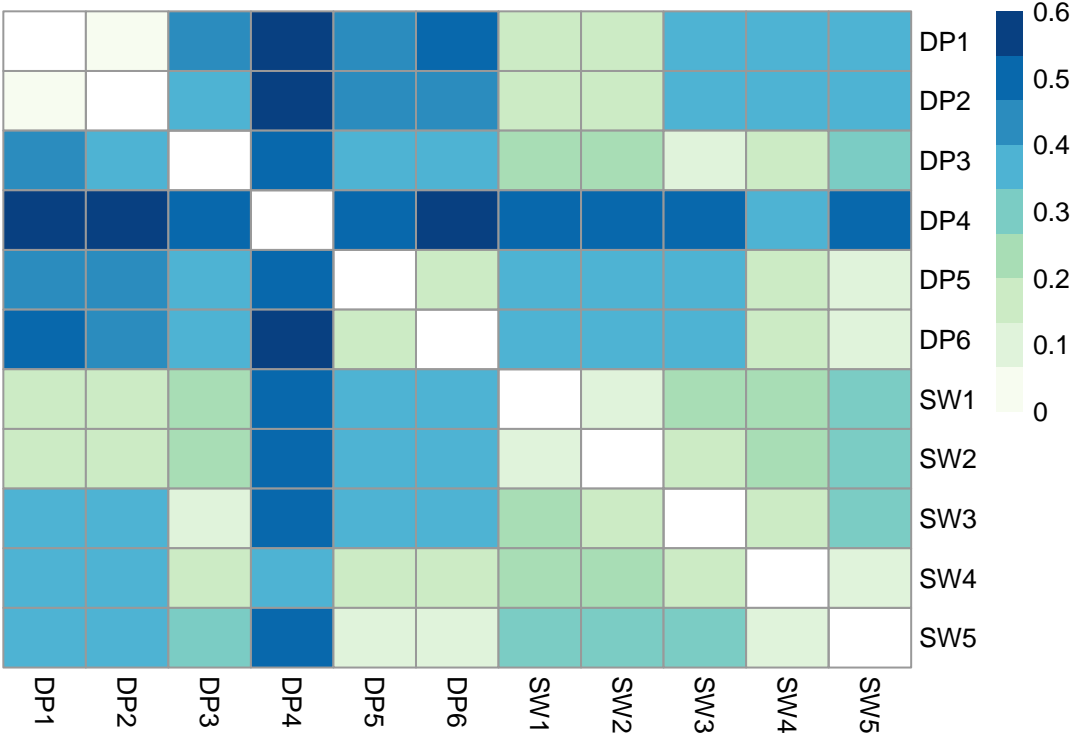

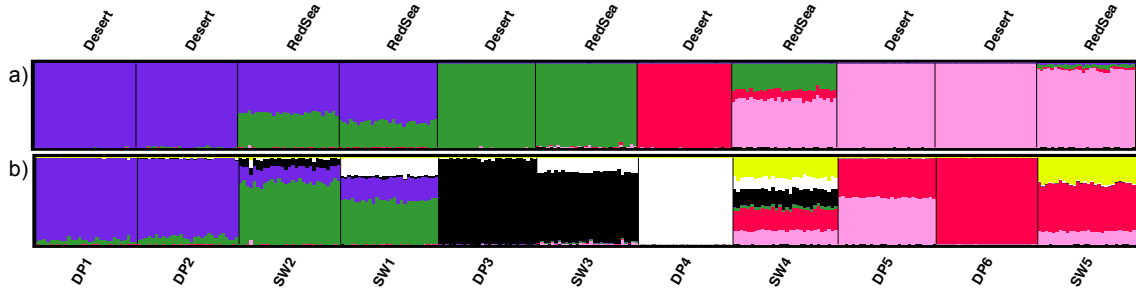

a)

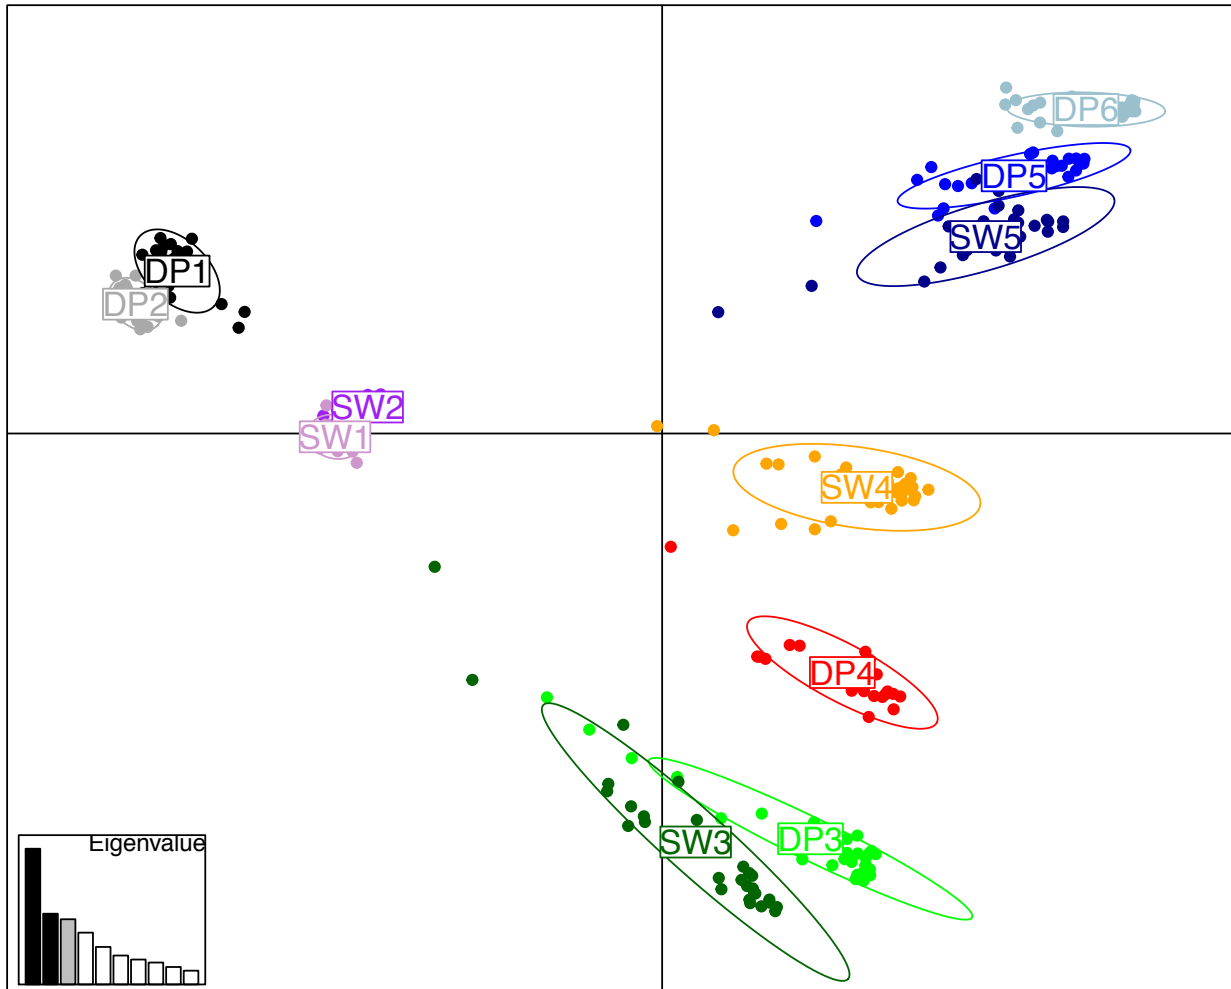

b)

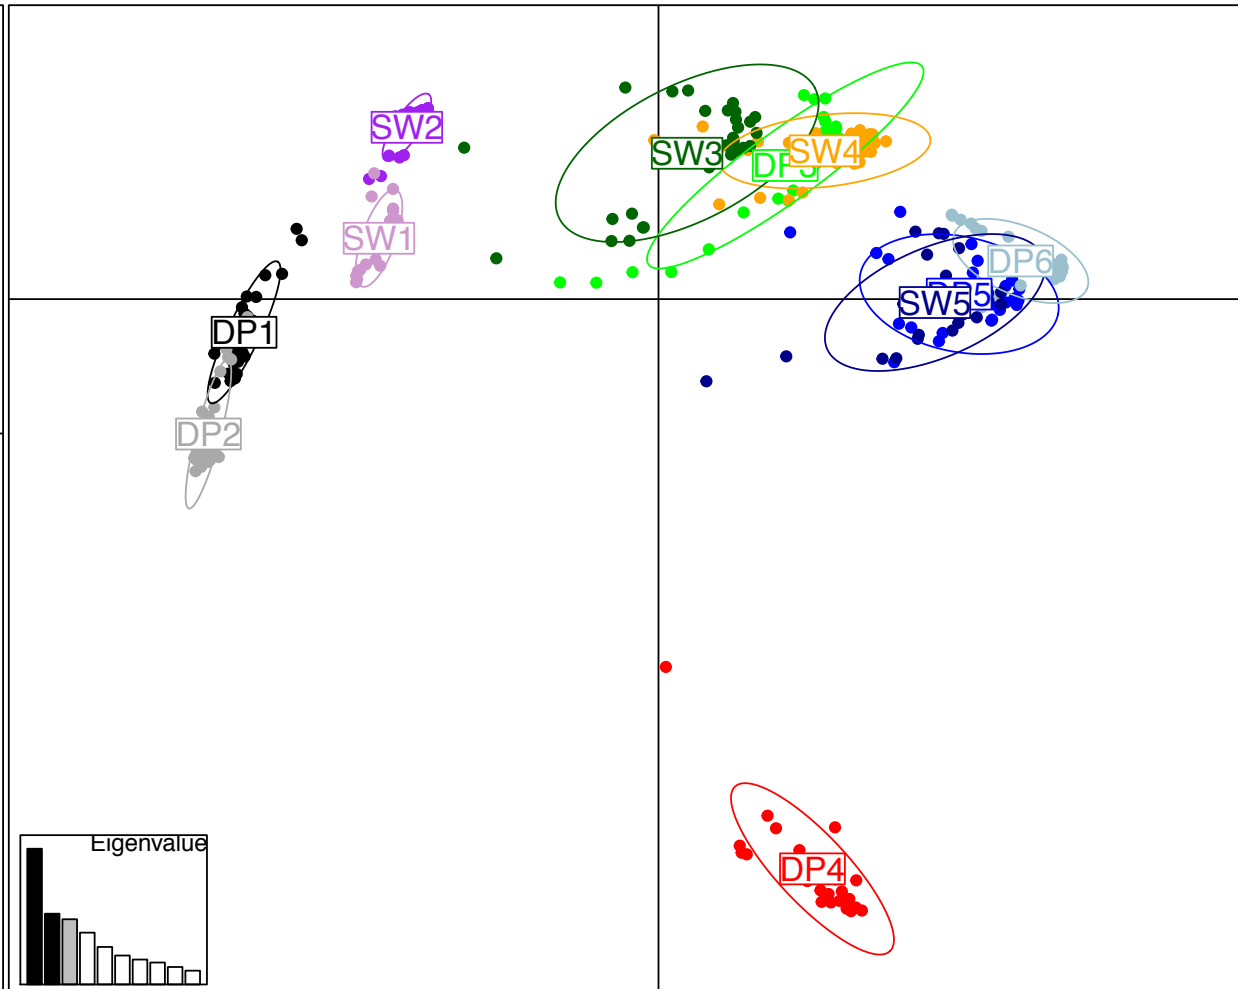

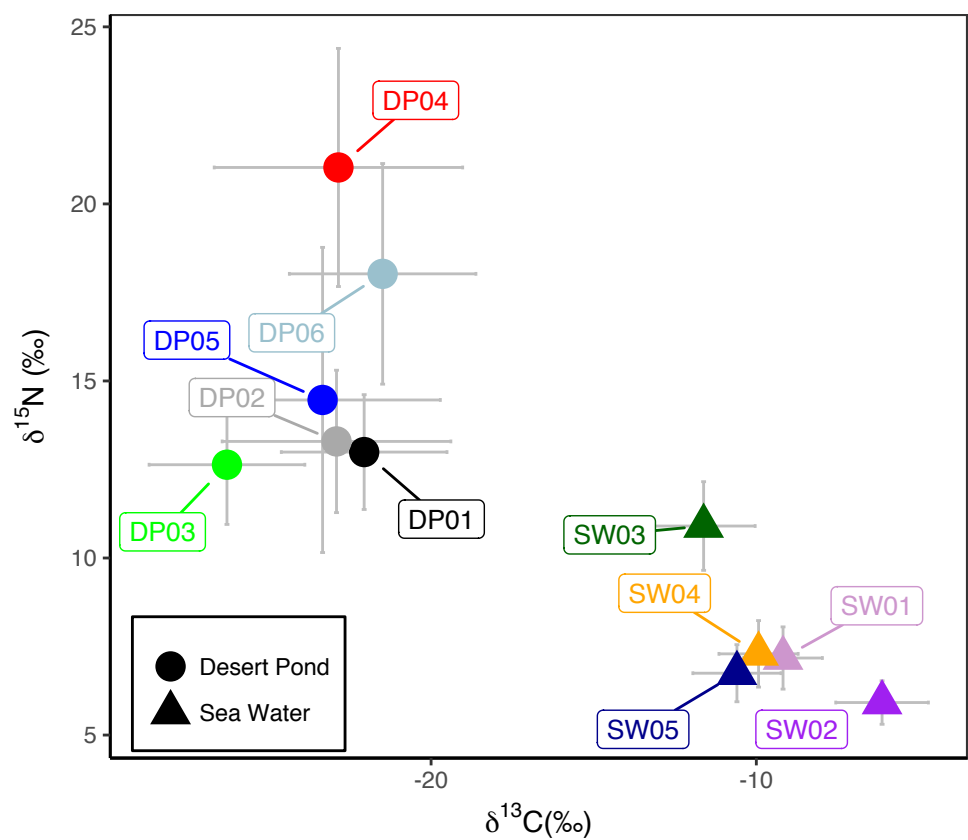



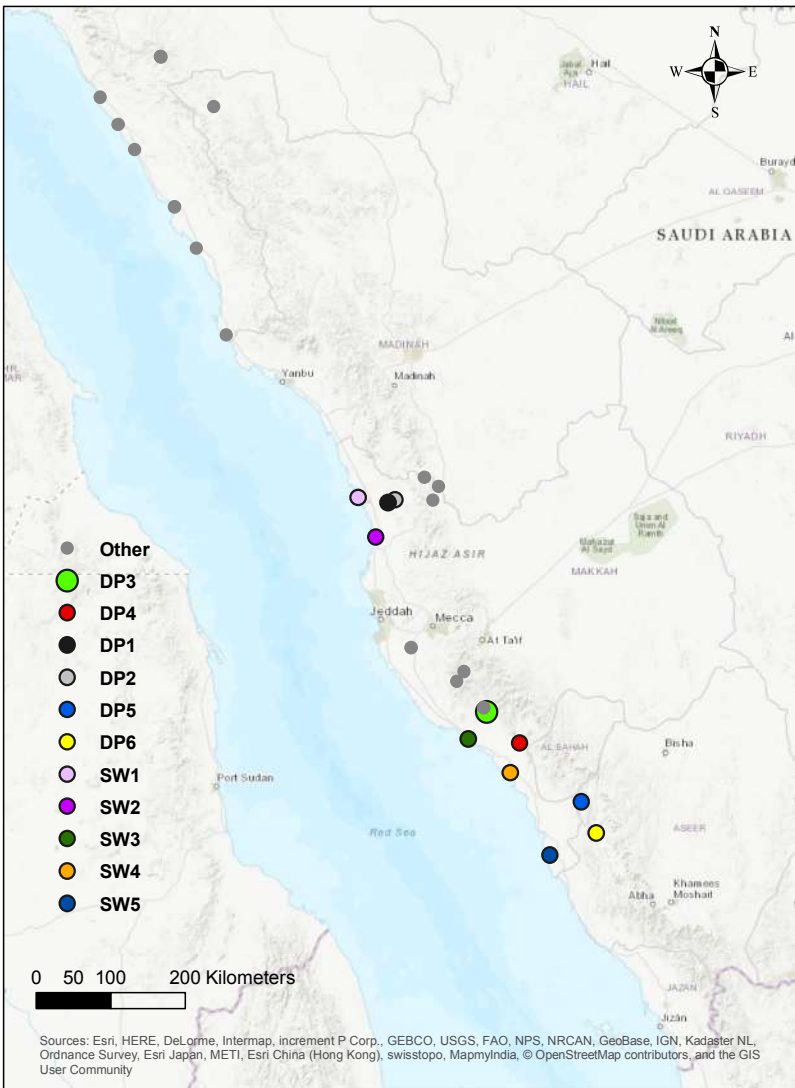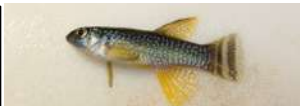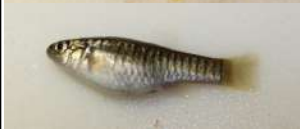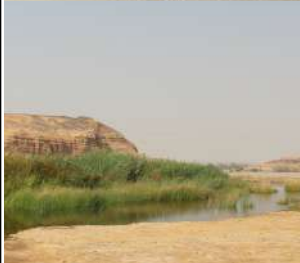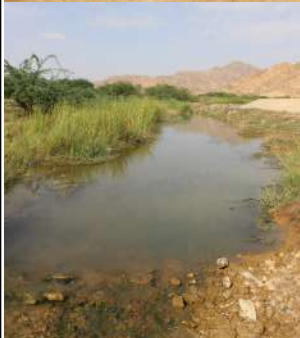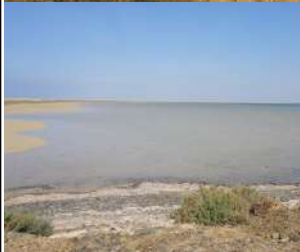

Sources: Esri, HERE, DeLorme, Intermap, increment P Corp., GEBCO, USGS, FAO, NPS, NRCAN, GeoBase, IGN, Kadaster NL, Ordnance Survey, Esri Japan, METI, Esri China (Hong Kong), swisstopo, MapmyIndia, © OpenStreetMap contributors, and the GIS User Community
